# Supplementary material for: Physics-Informed Neural Networks for the Reynolds Equation with Transient Cavitation Modeling
Source: Preprints.org preprint supplement (doi:10.20944/preprints202410.1000.v1), 2024-10-14
Supplement: Supplementary file 9 [file supplementary]

## Neural Network

$$\begin{aligned} |\mathcal{L}_{FB}|_2^2 &= \mathcal{L}_{FB} \\ |\mathcal{L}_{Residual}|_2^2 &= \mathcal{L}_{Residual} \\ |\mathcal{L}_{BC}|_2^2 &= \mathcal{L}_{BC} \\ |\mathcal{L}_{IC}|_2^2 &= \mathcal{L}_{IC} \\ |\mathcal{L}_{SC}|_2^2 &= \mathcal{L}_{SC} \end{aligned}$$

## Loss Balancing

$$\text{Calculate} \Rightarrow \begin{cases} \lambda_{FB} \\ \lambda_{Residual} \\ \lambda_{BC} \\ \lambda_{IC} \\ \lambda_{SC} \end{cases}$$

## Final Loss

$$\mathcal{L} = \sum_{i=1}^n \lambda_i \mathcal{L}_i$$
