# Supplementary figures and images for: Physics-Informed Neural Networks for the Reynolds Equation with Transient Cavitation Modeling
Source: Preprints.org preprint supplement (doi:10.20944/preprints202410.1000.v1), 2024-10-14

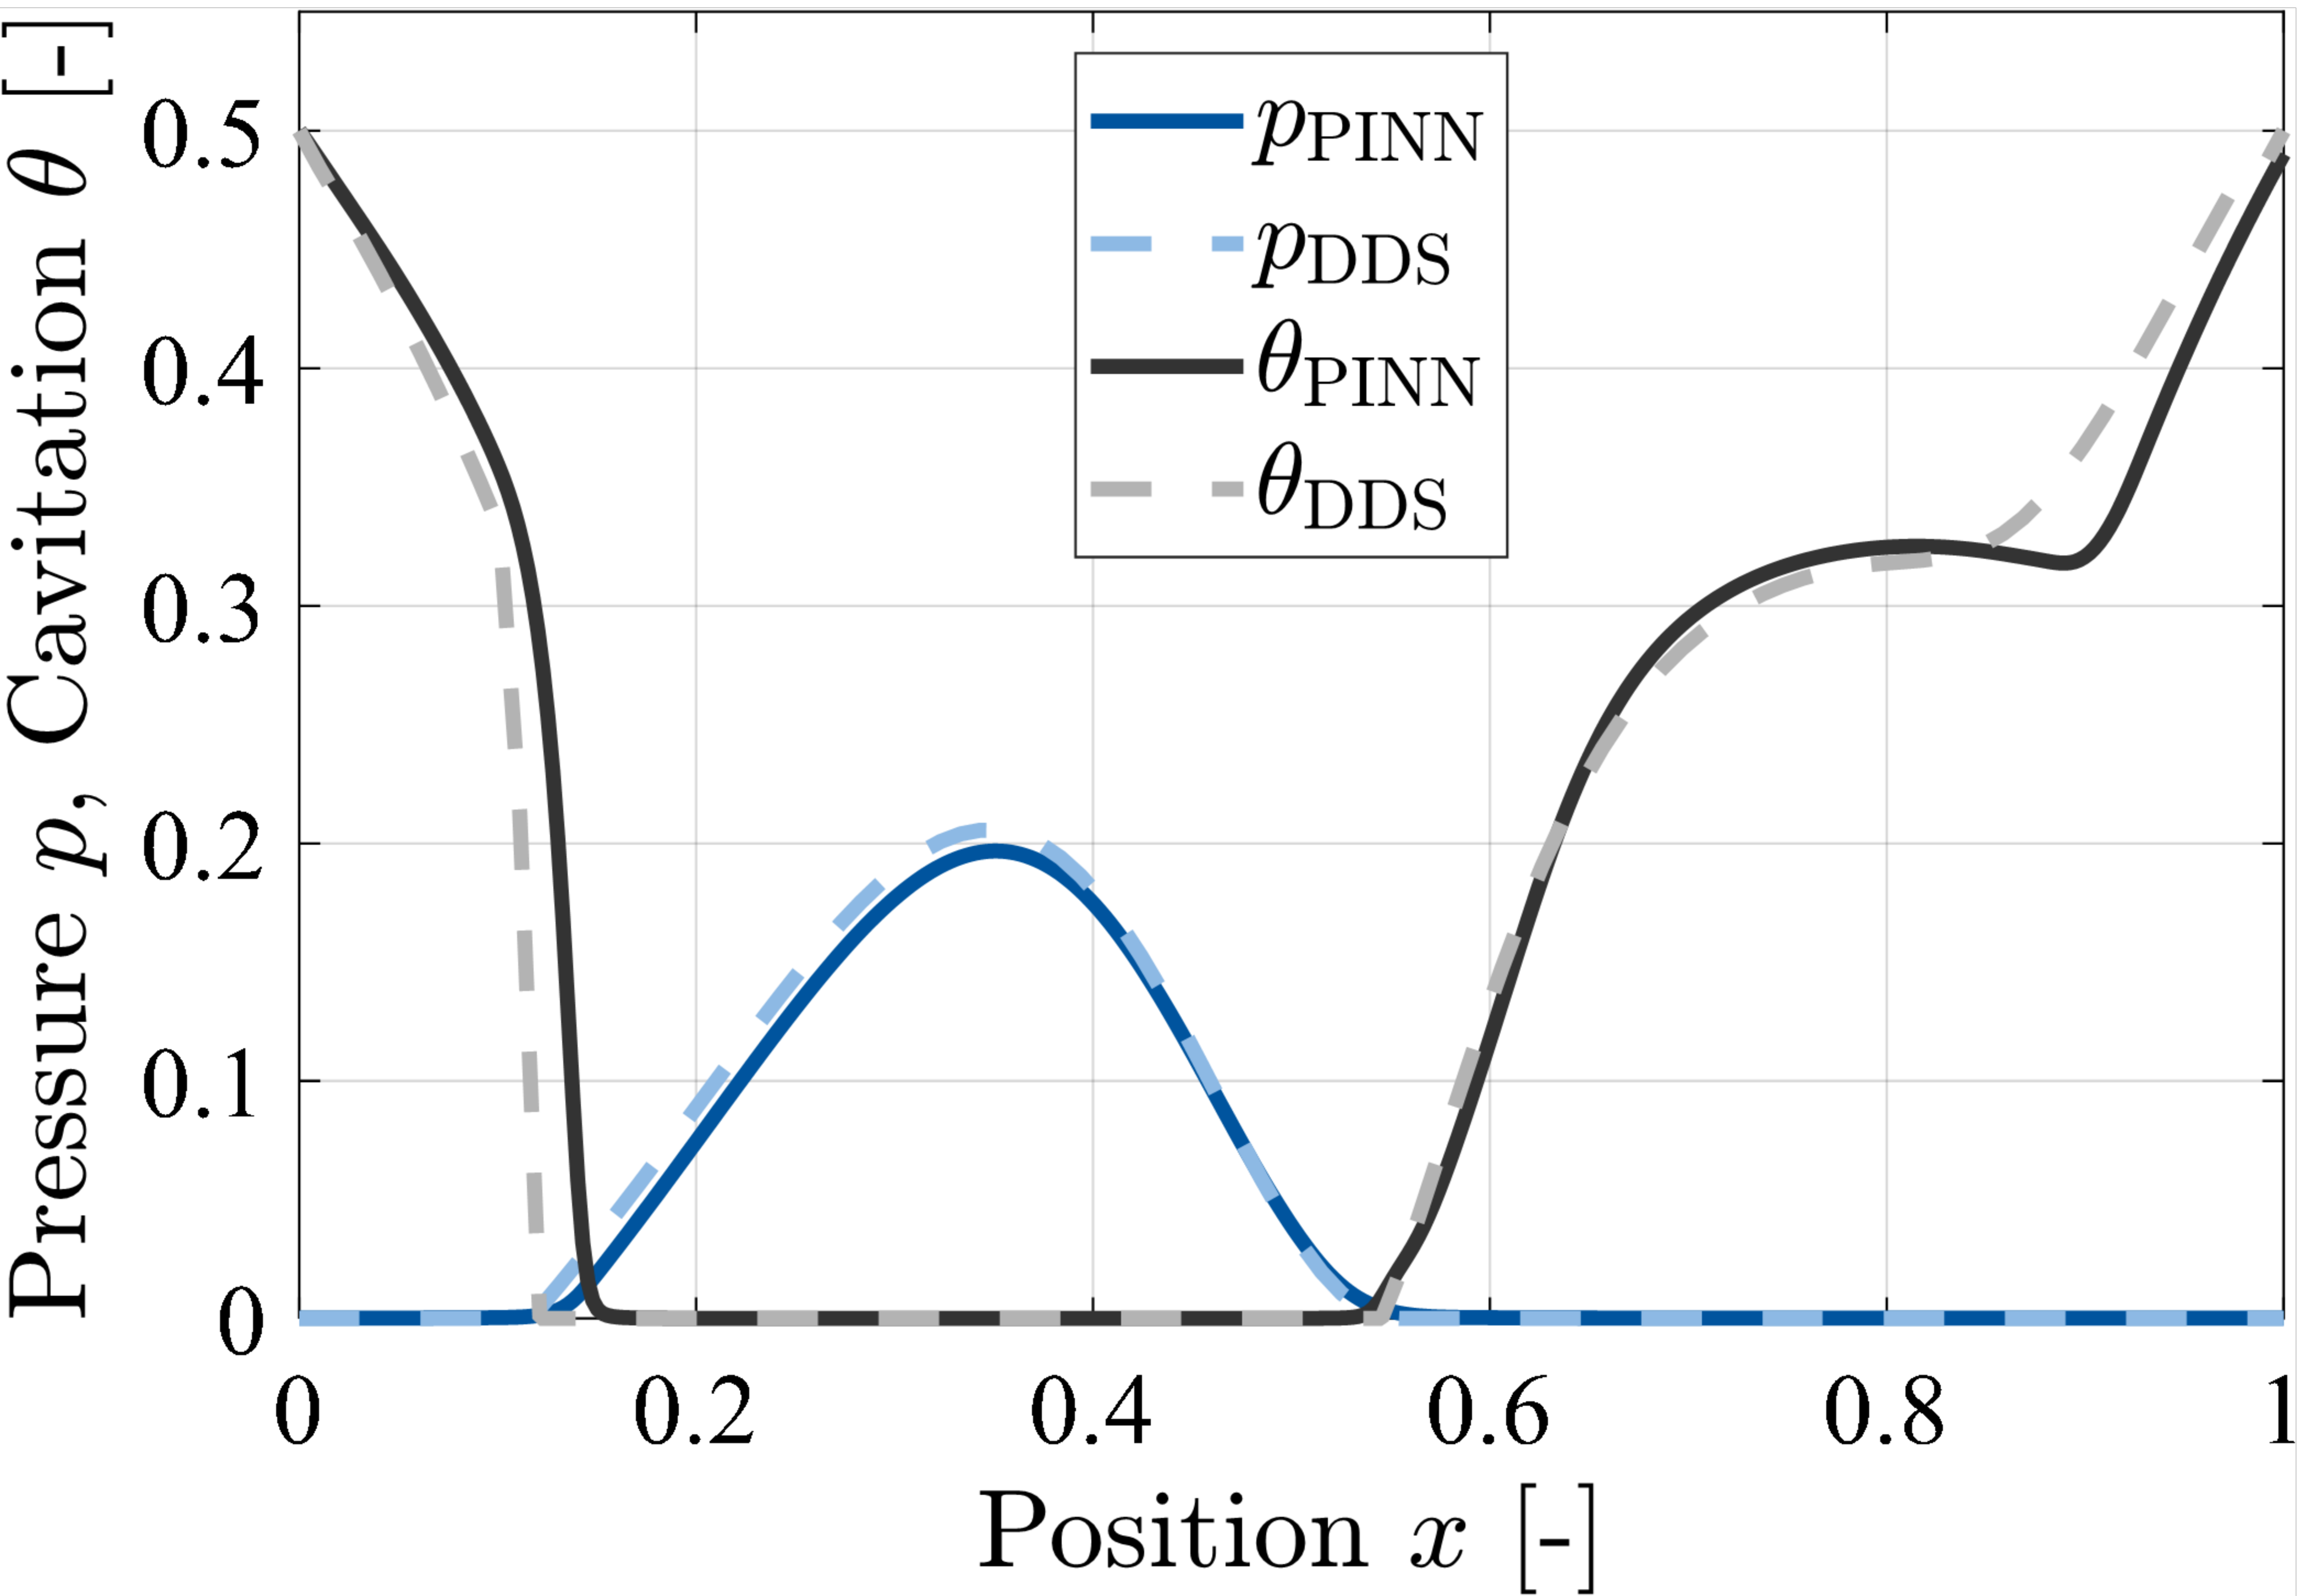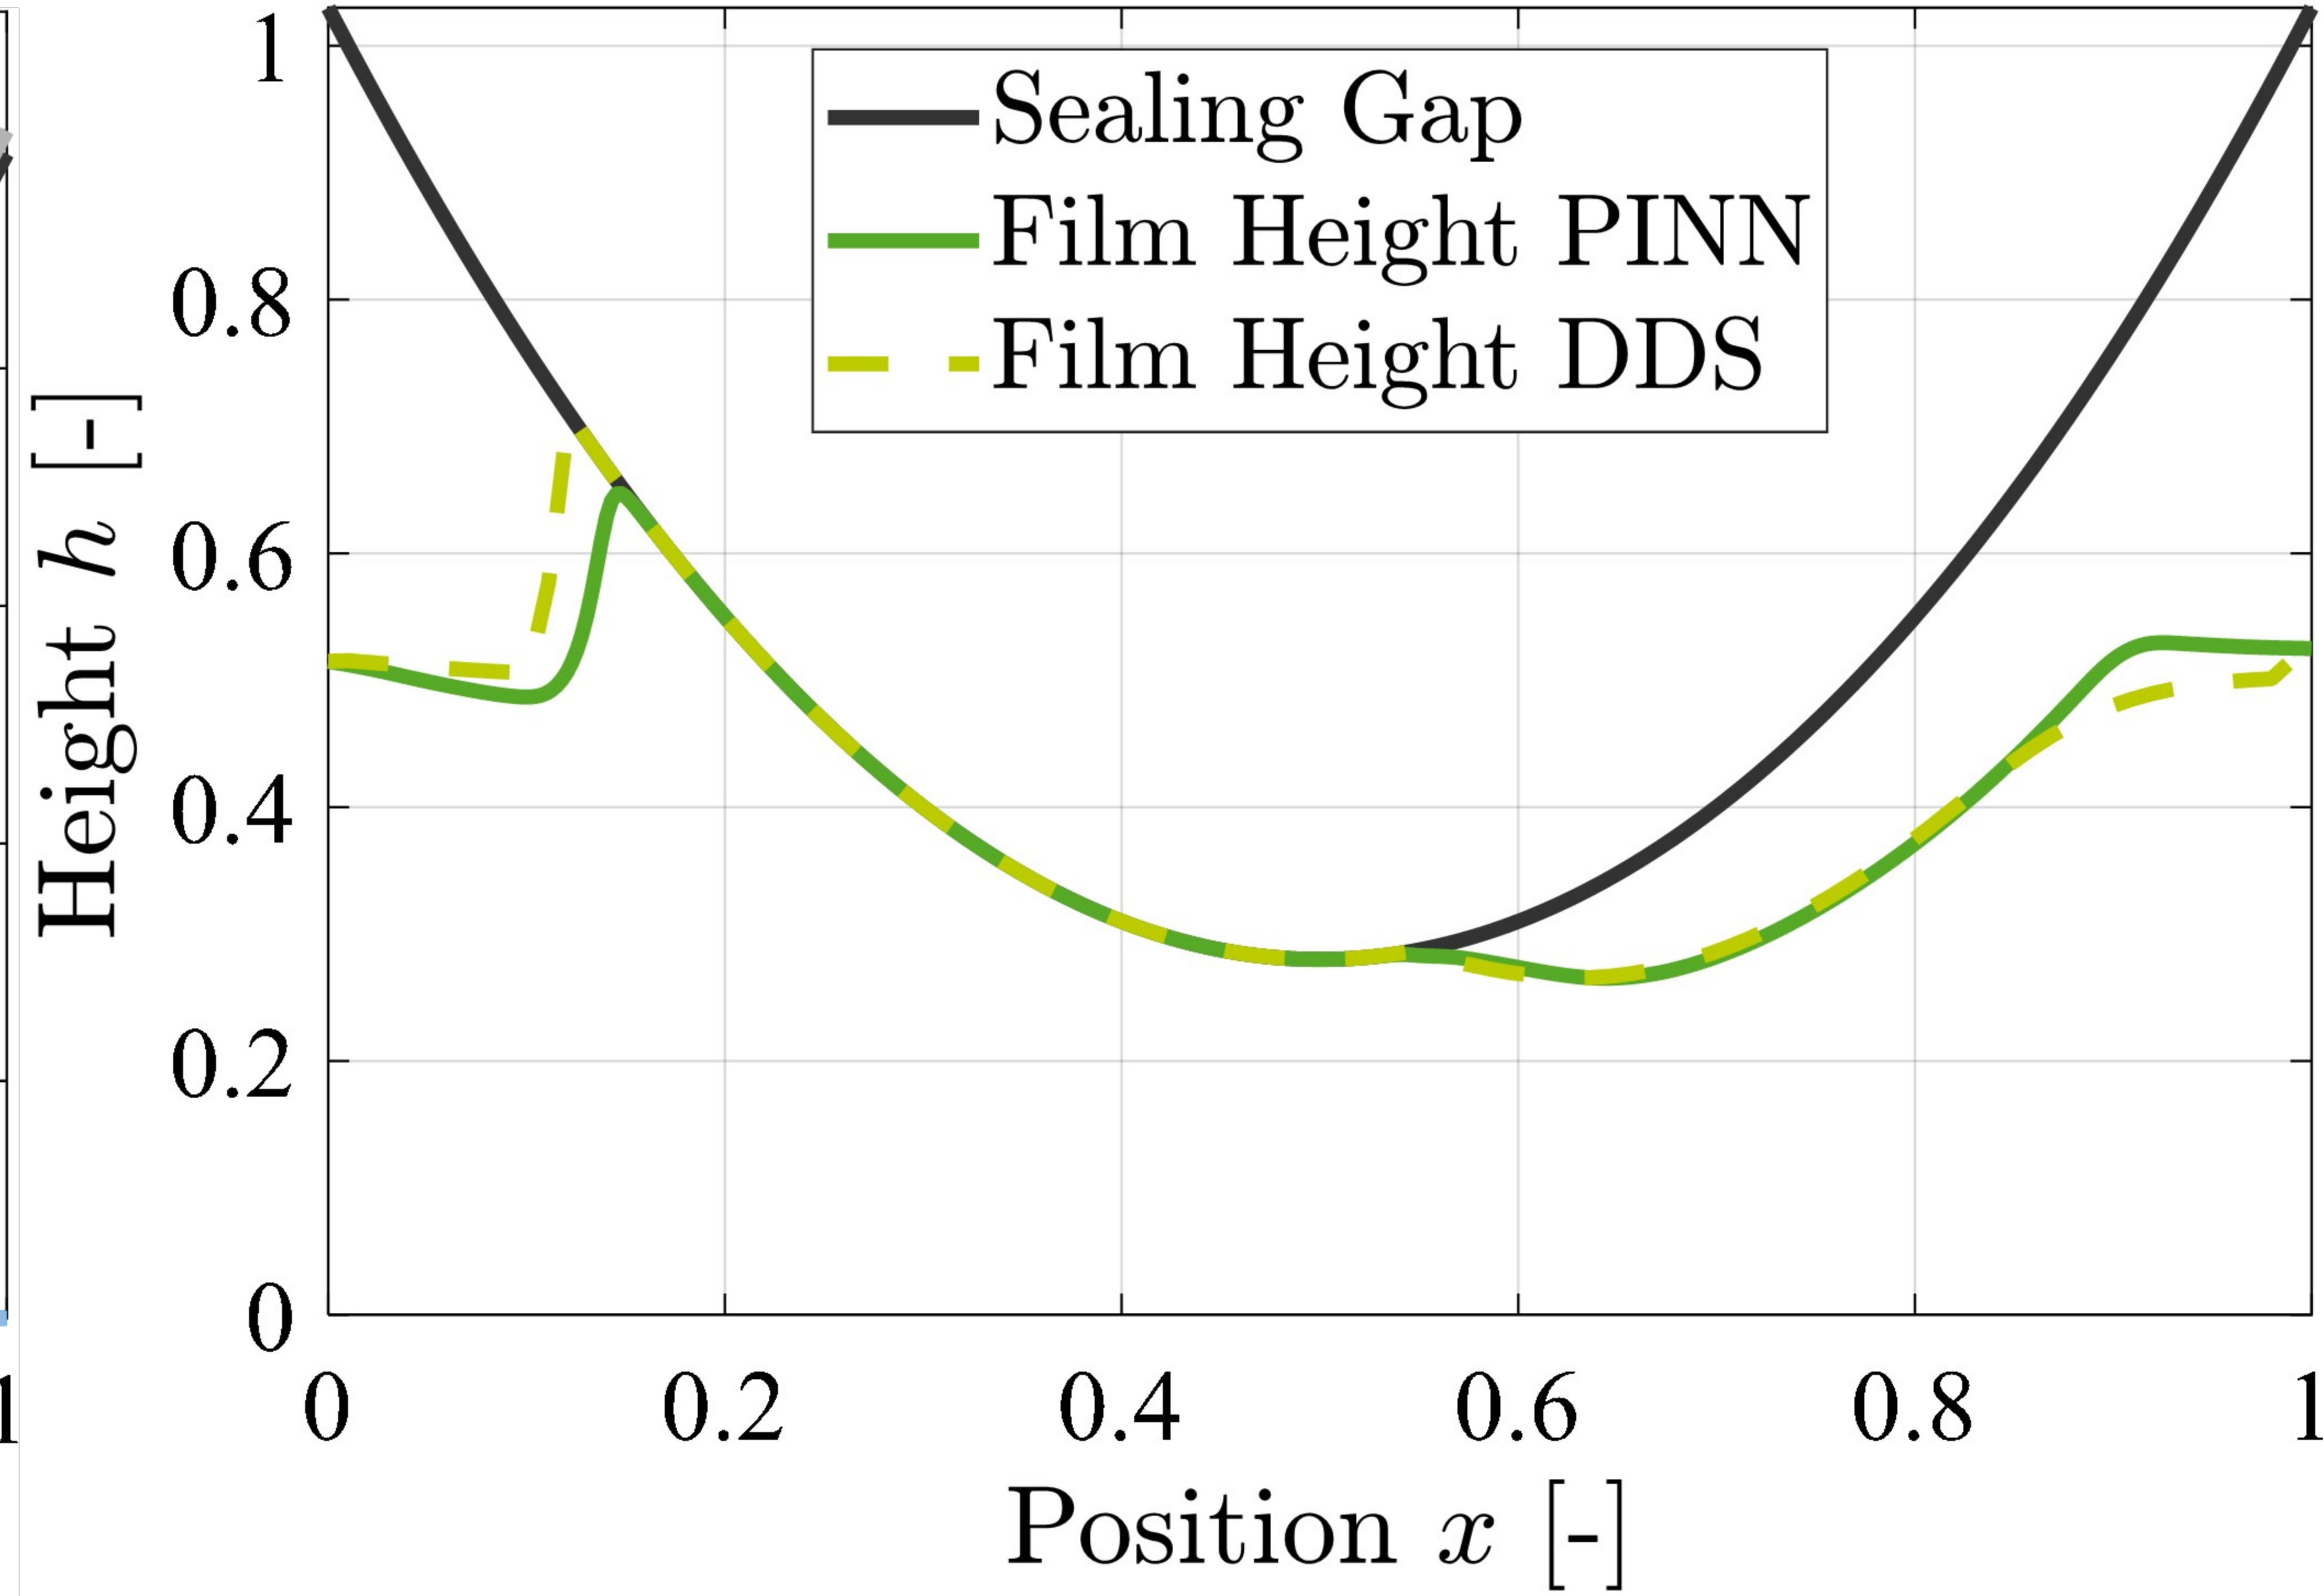

Supplement: Supplementary file 1 [file supplementary]

$$h_1 = 1$$

$$h_2 = 1$$

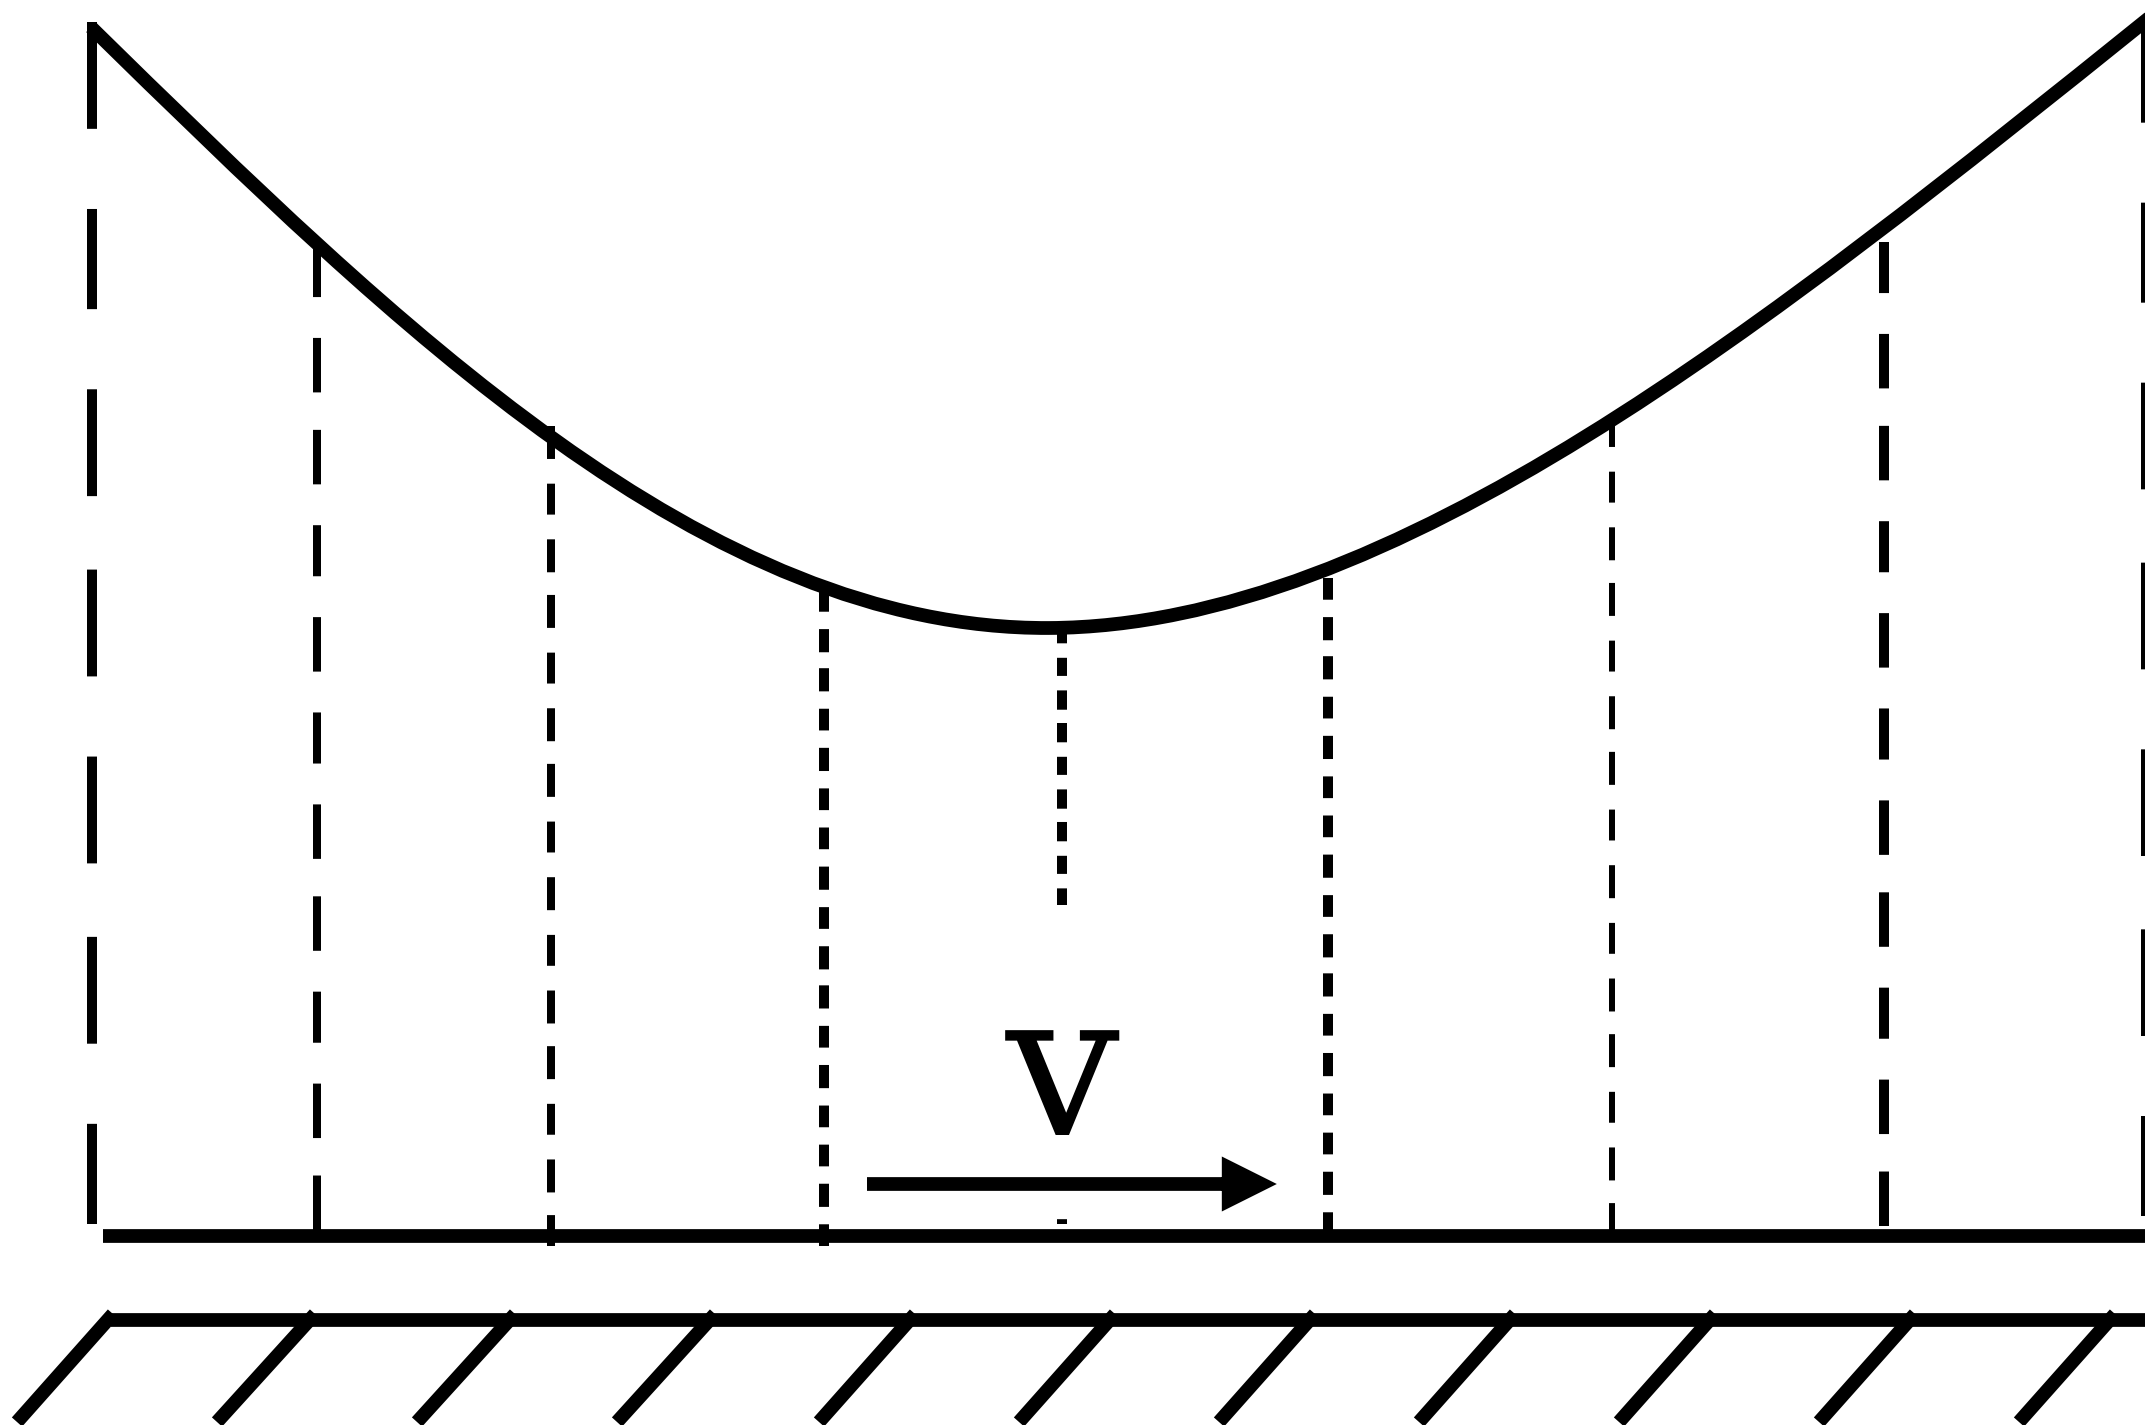

$$x=0$$

$$x=1$$

Supplement: Supplementary file 2 [file supplementary]

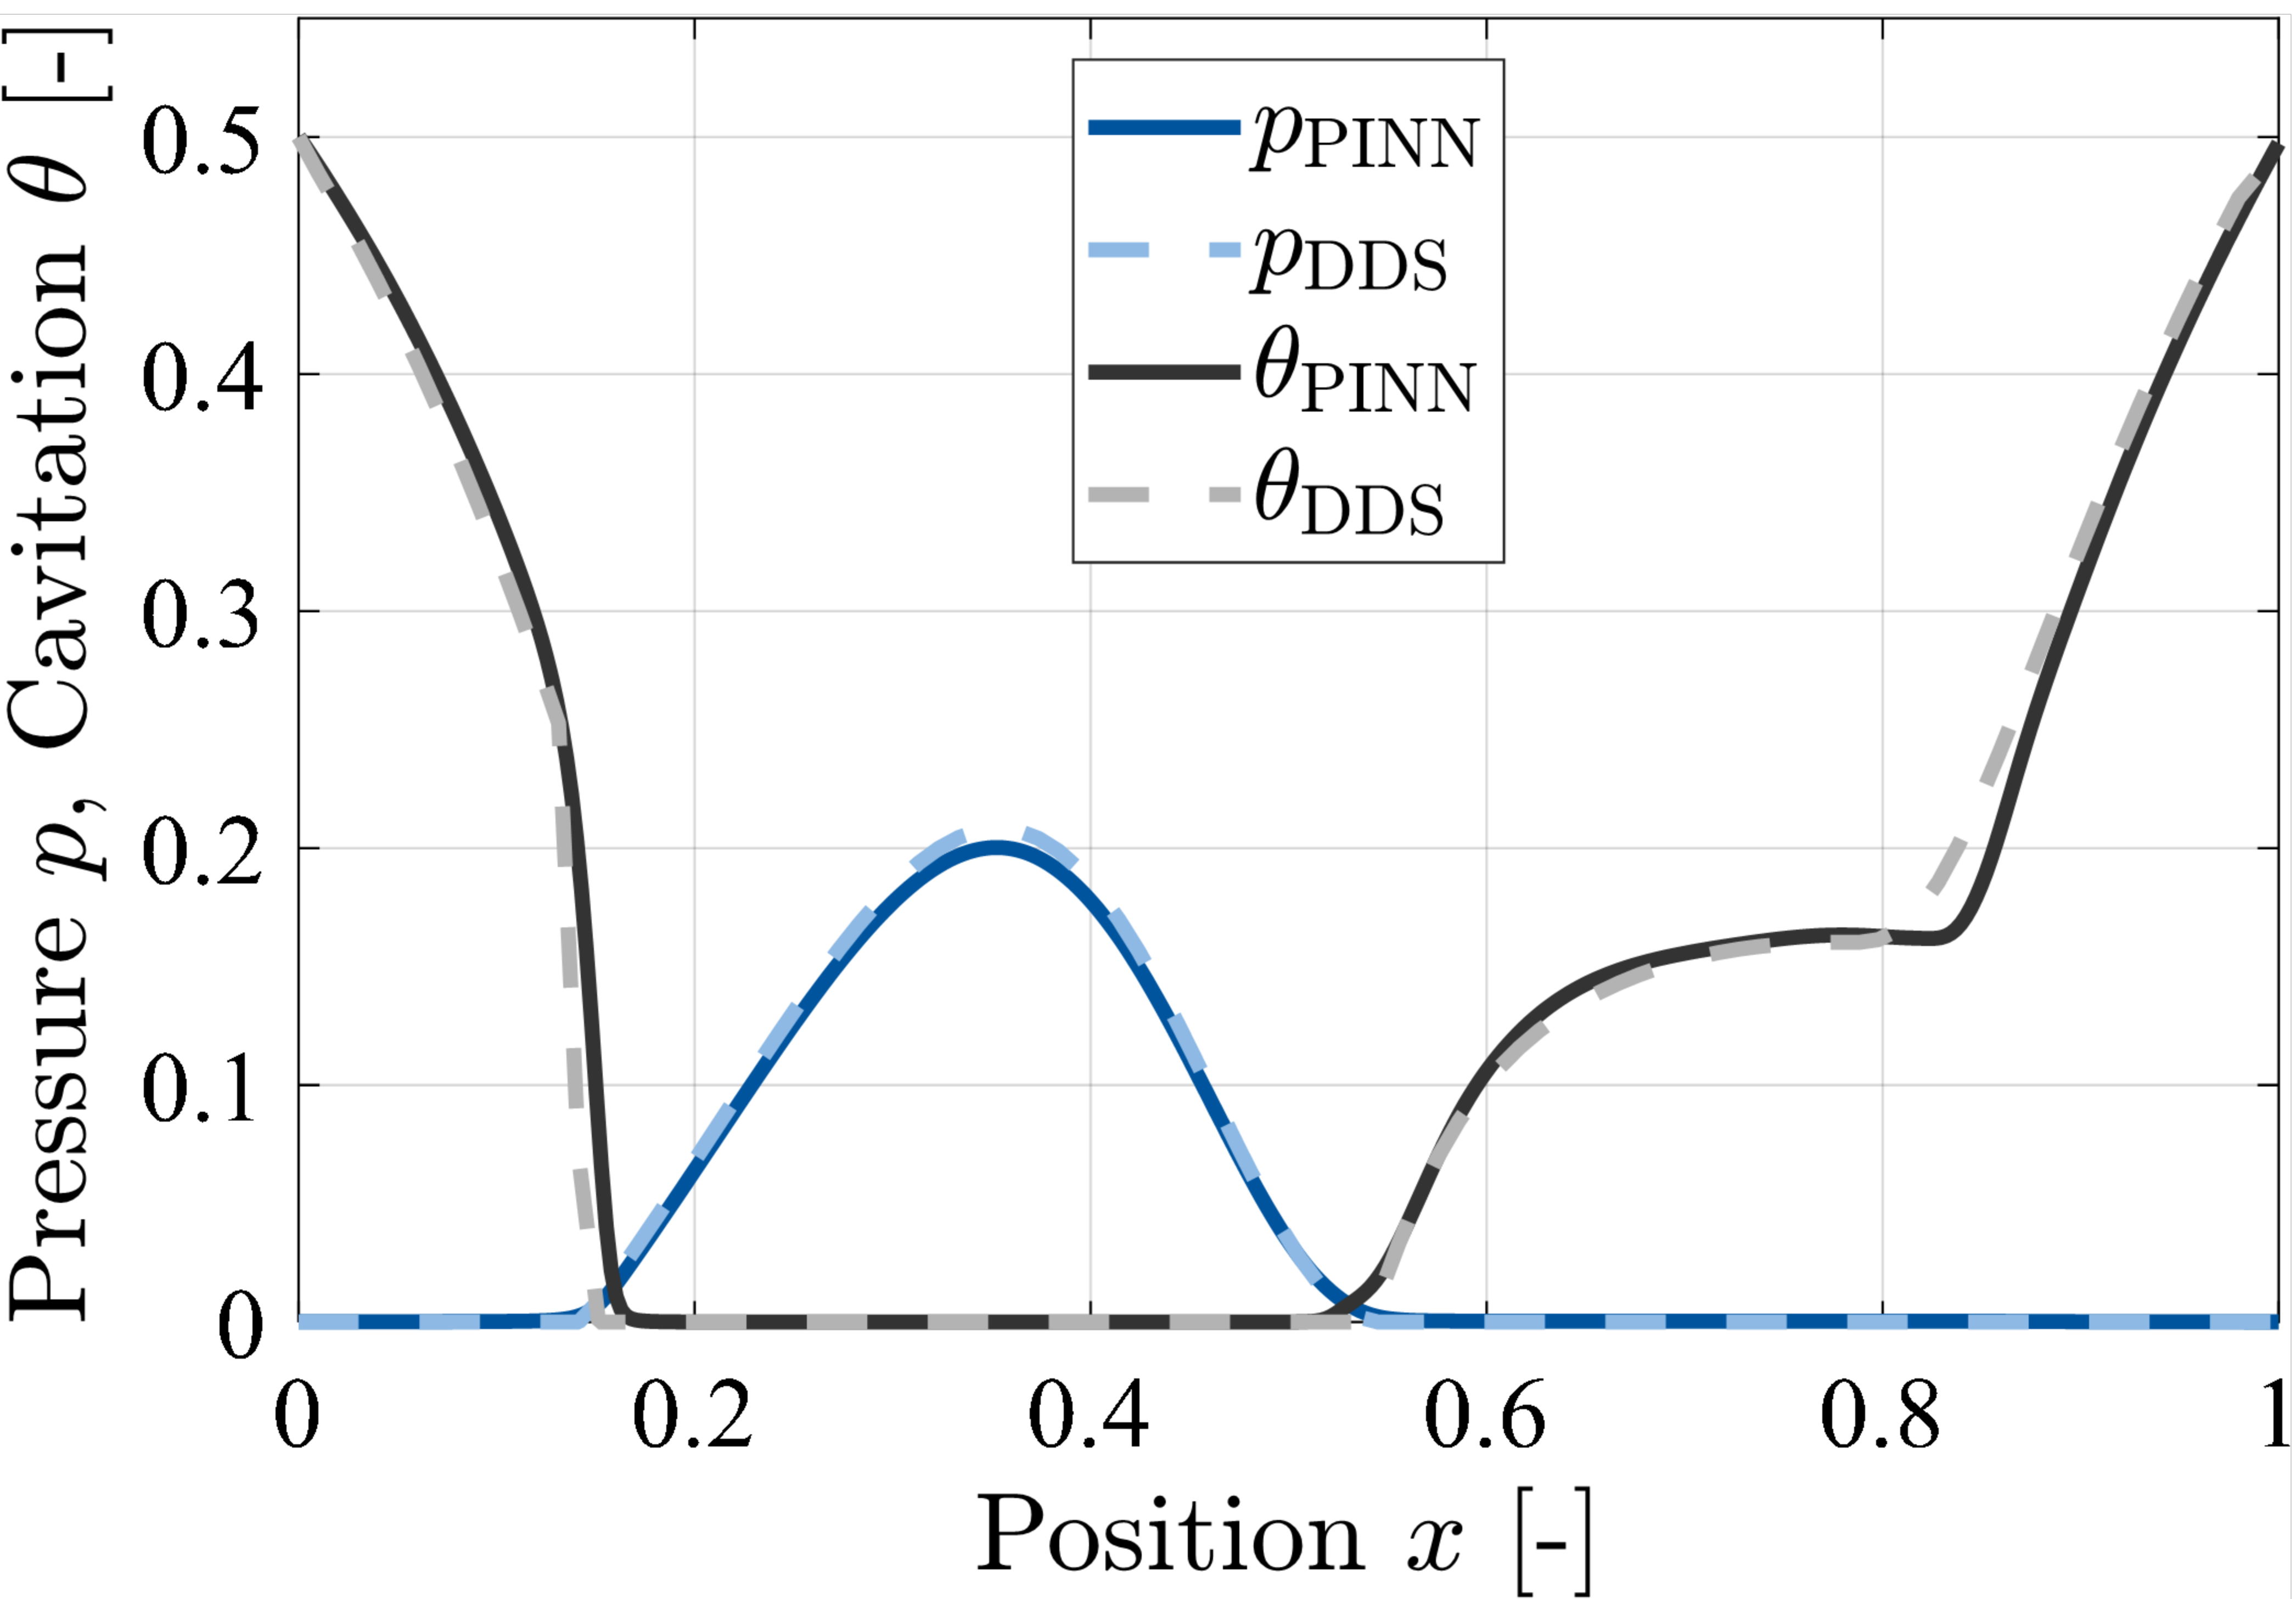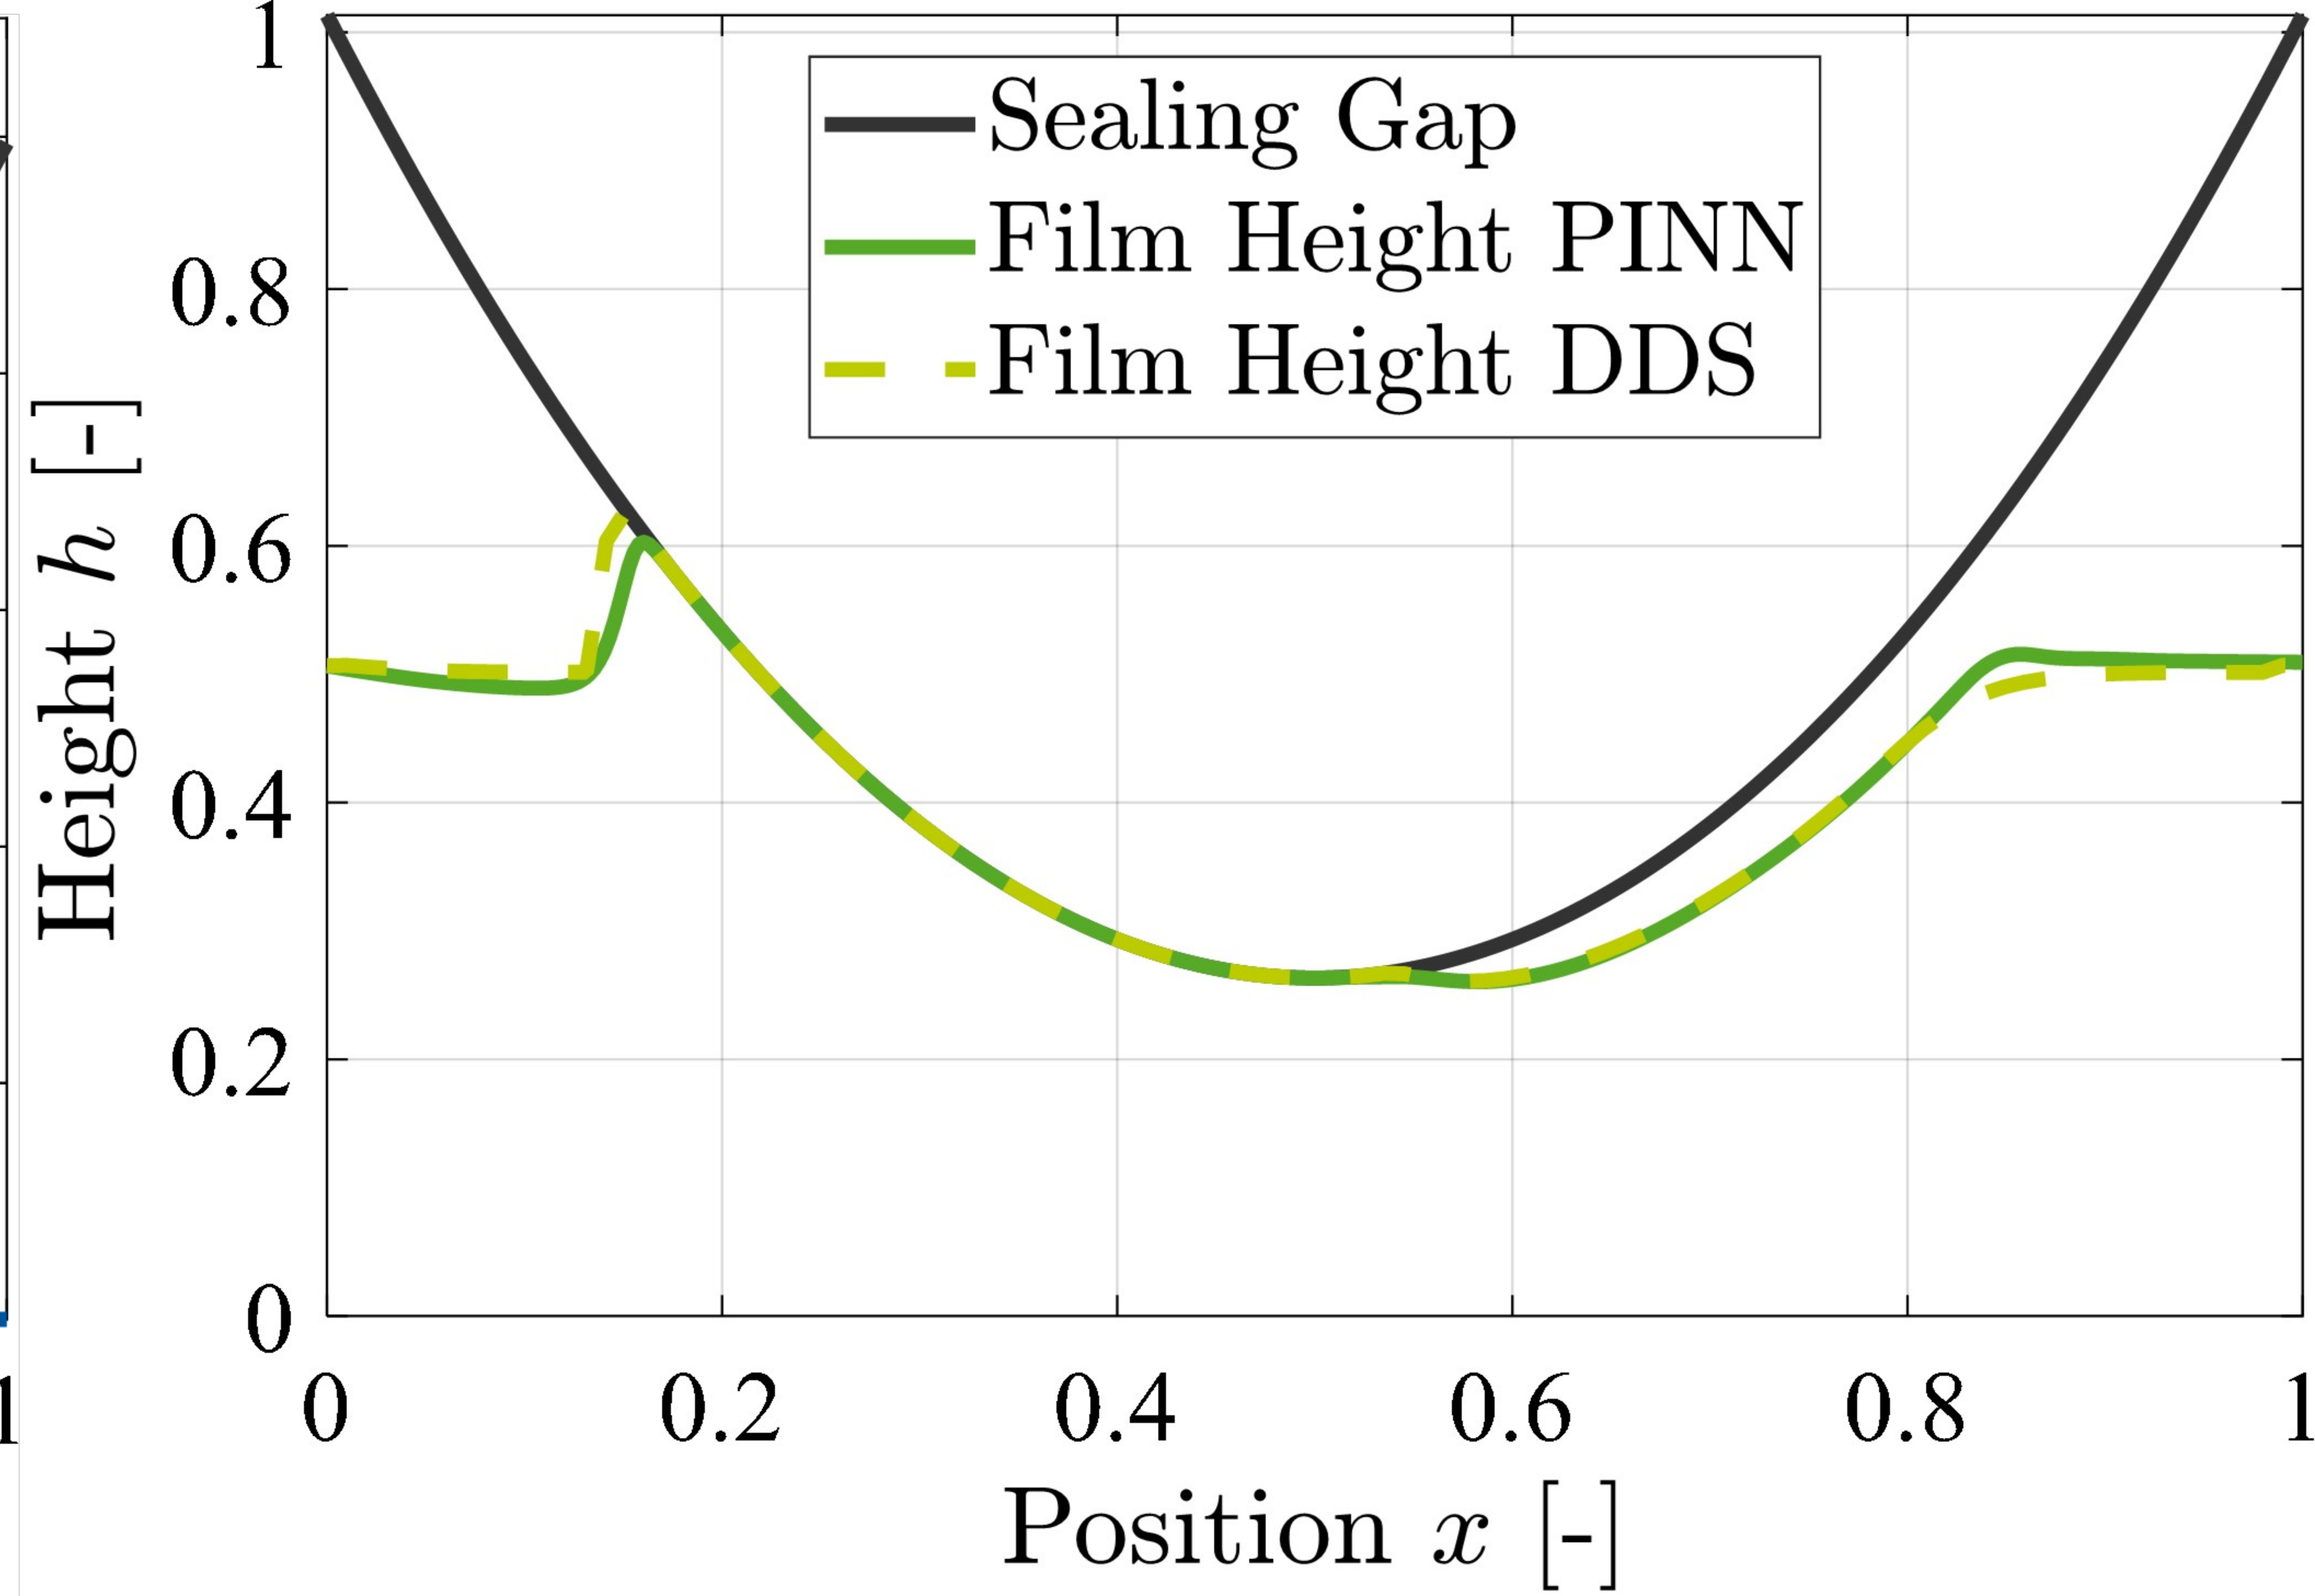

Supplement: Supplementary file 3 [file supplementary]

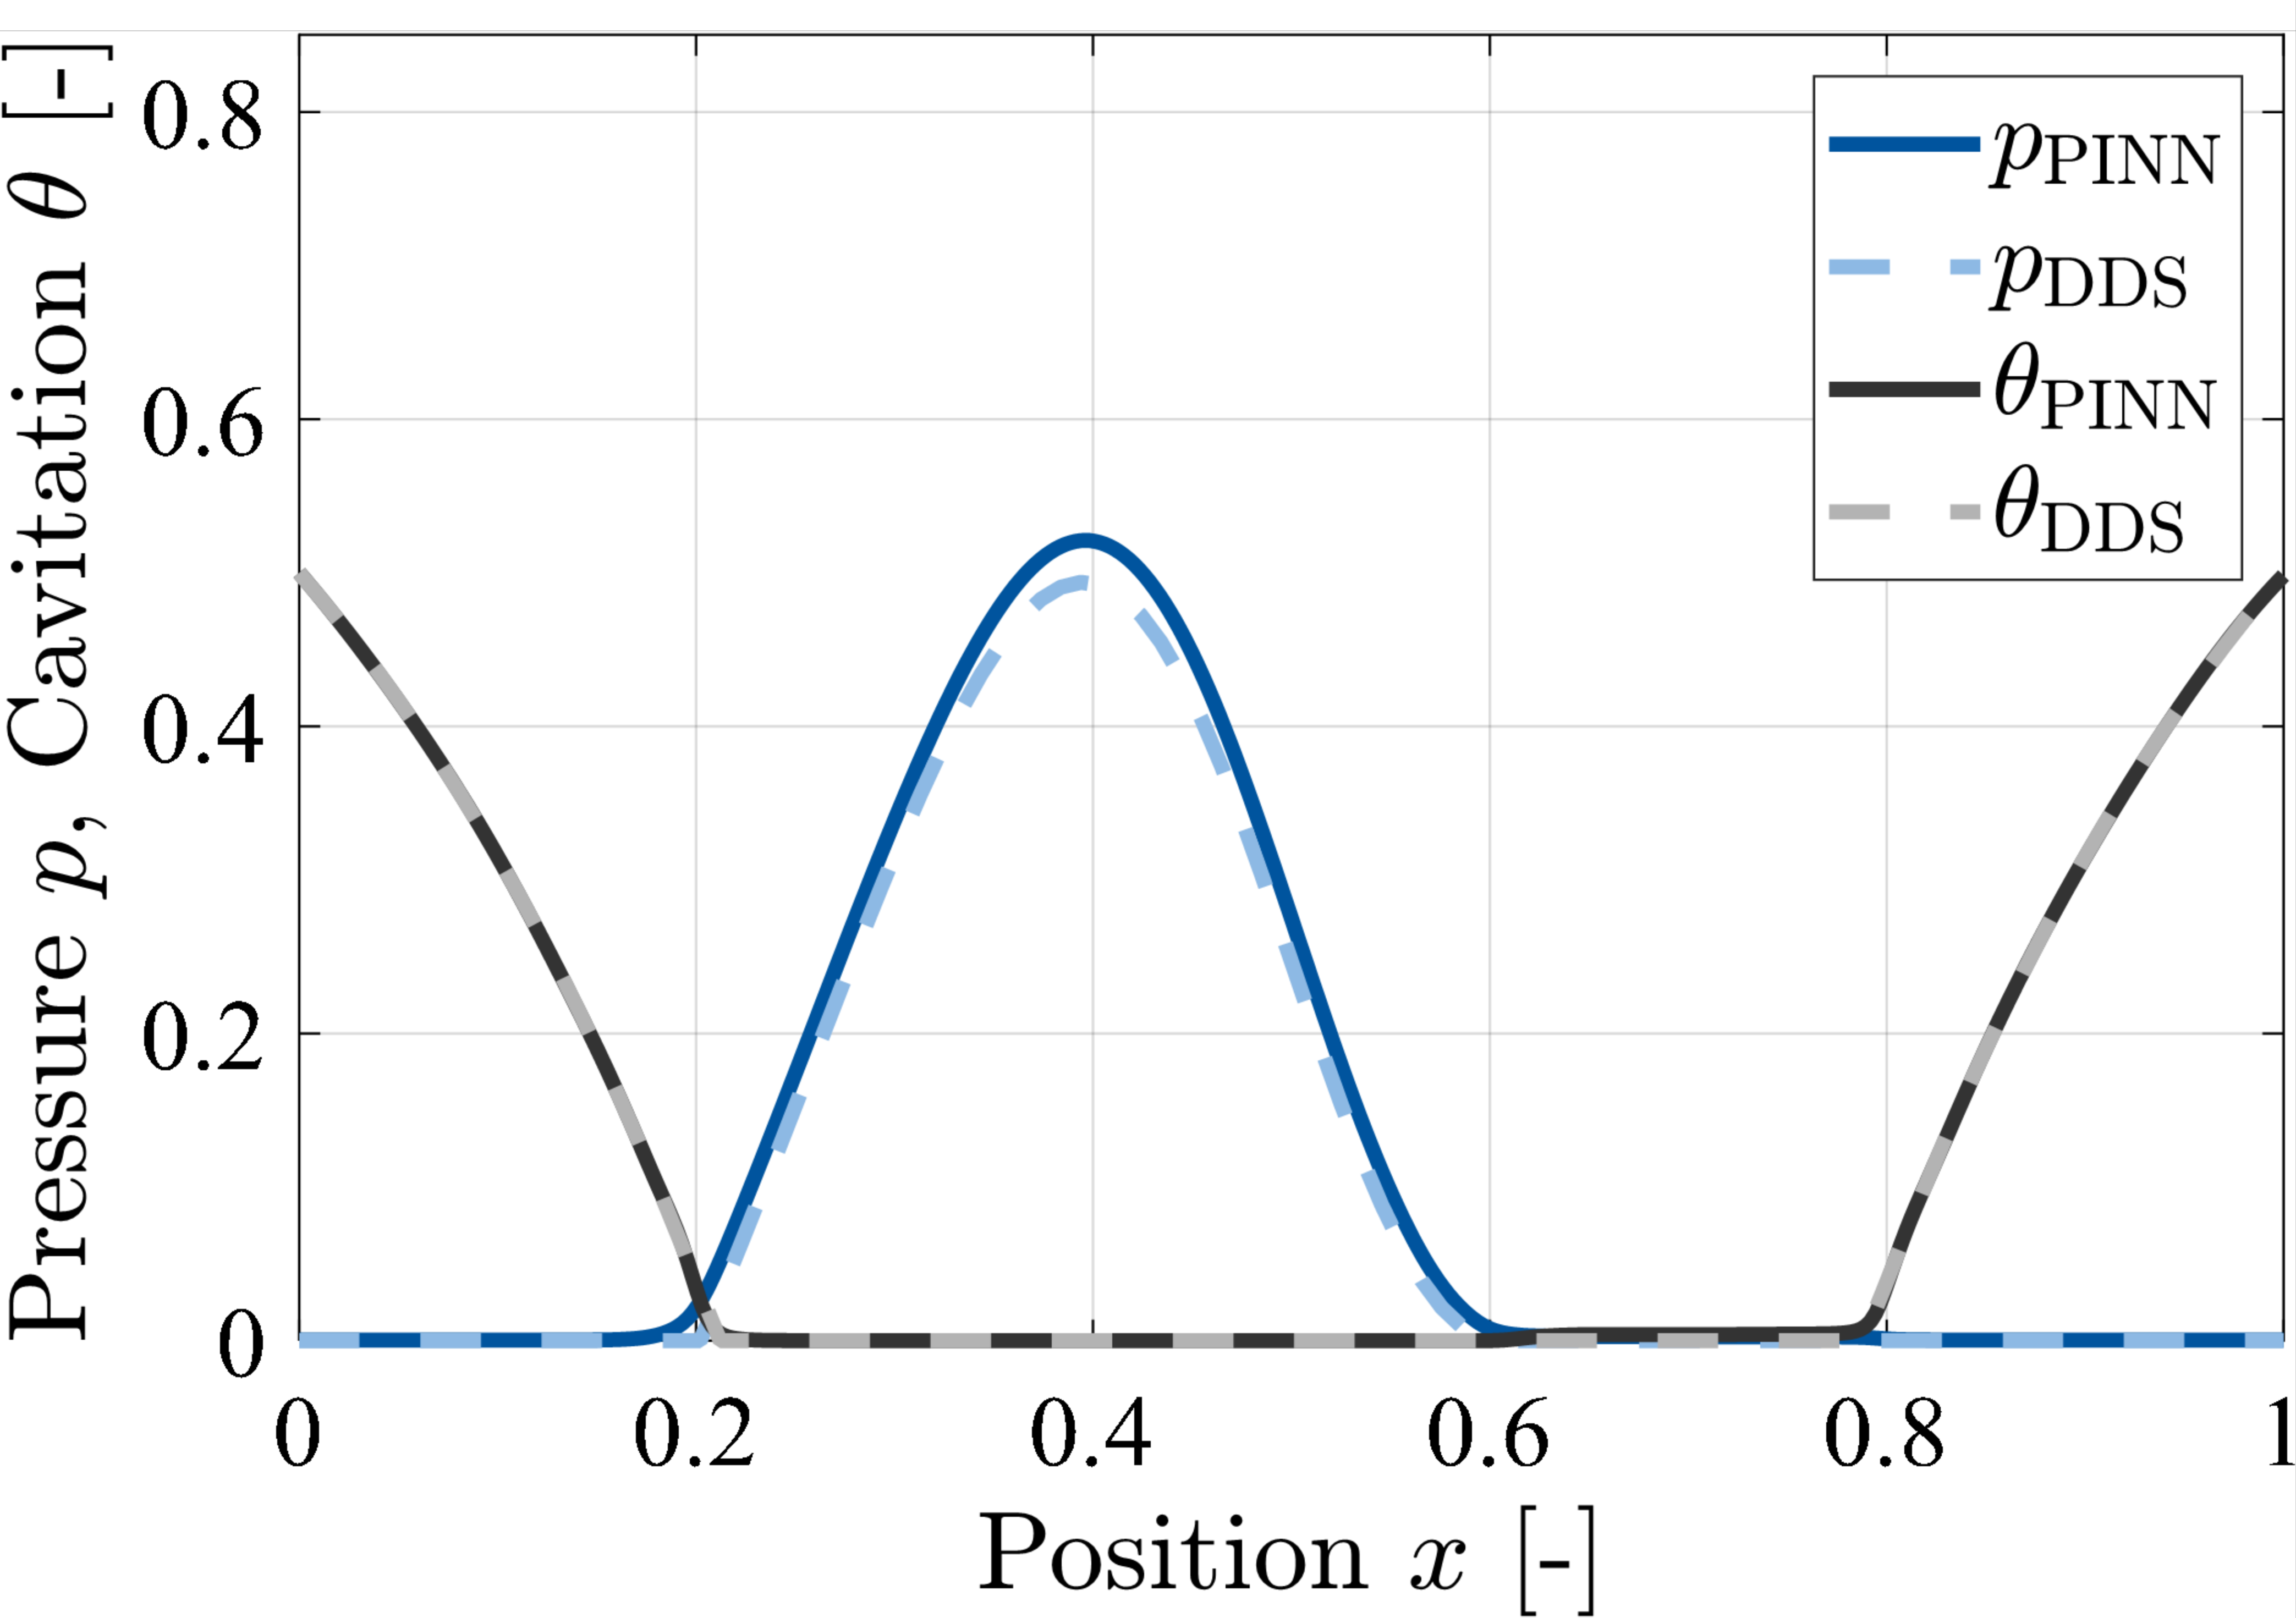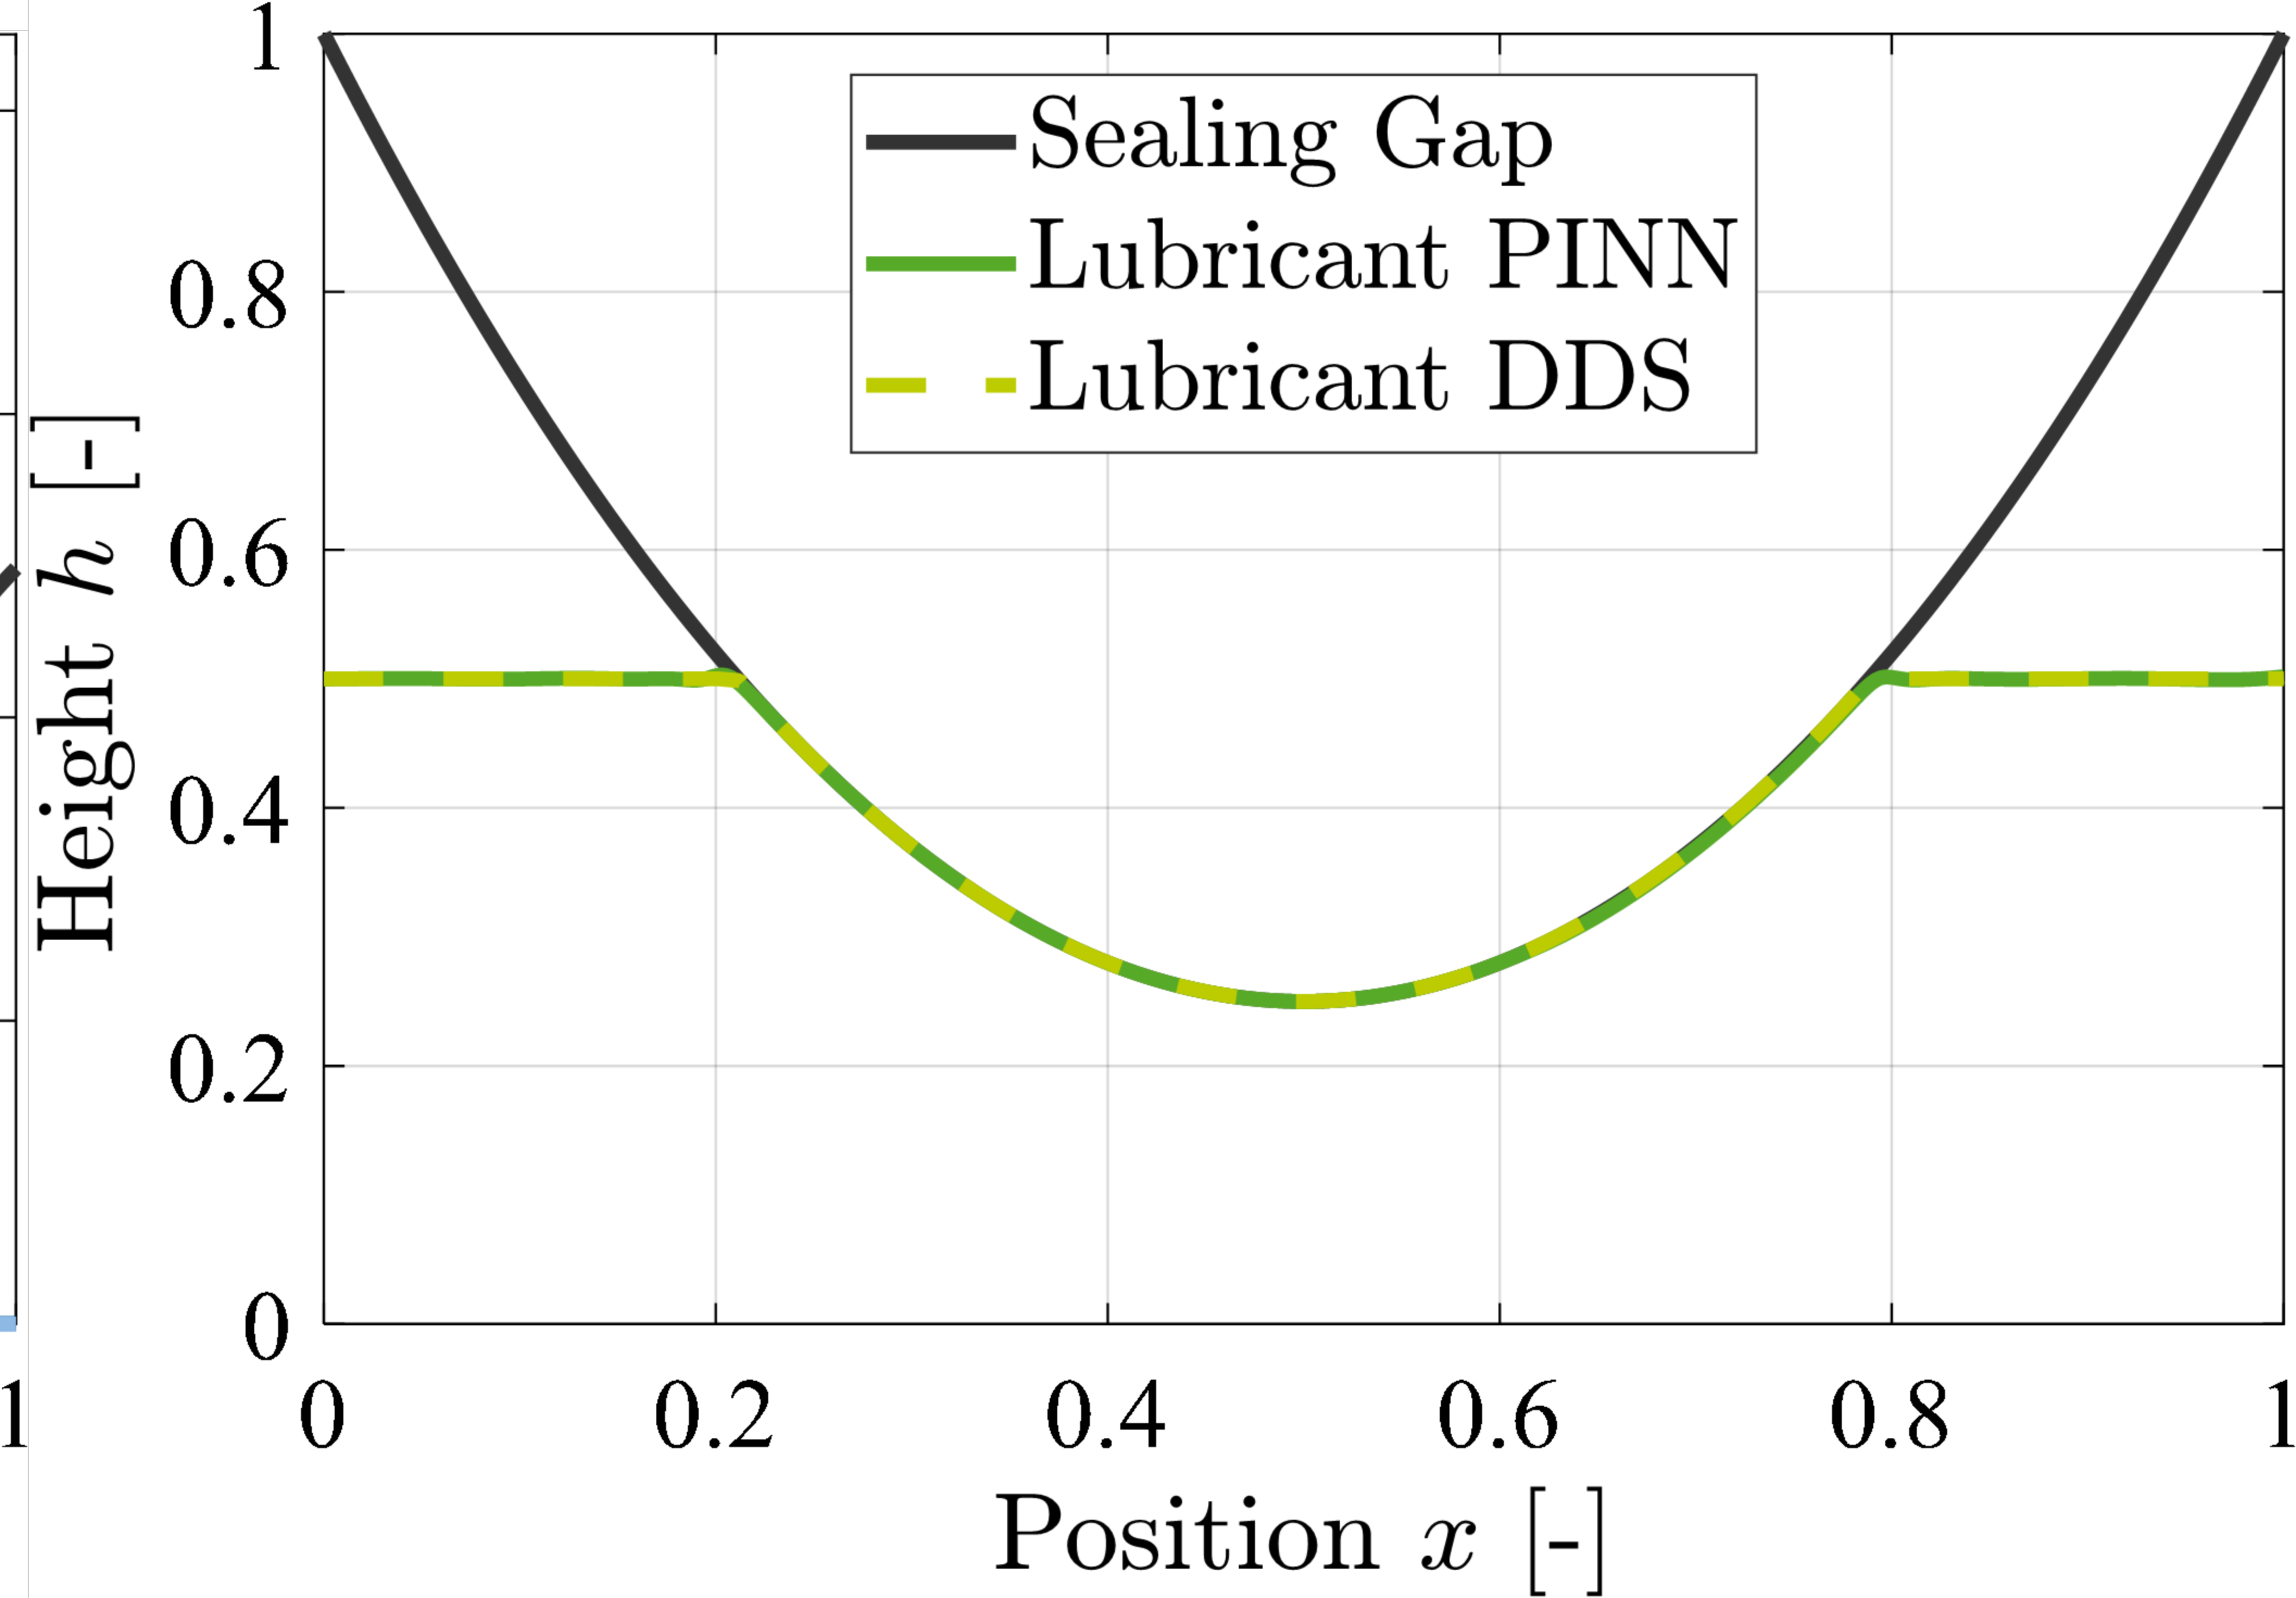

Supplement: Supplementary file 5 [file supplementary]

Input Hidden Layers Output AD Losses Optimise

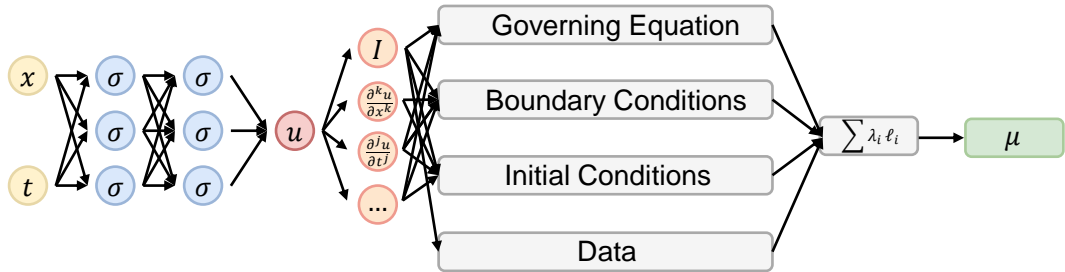

Supplement: Supplementary file 6 [file supplementary]

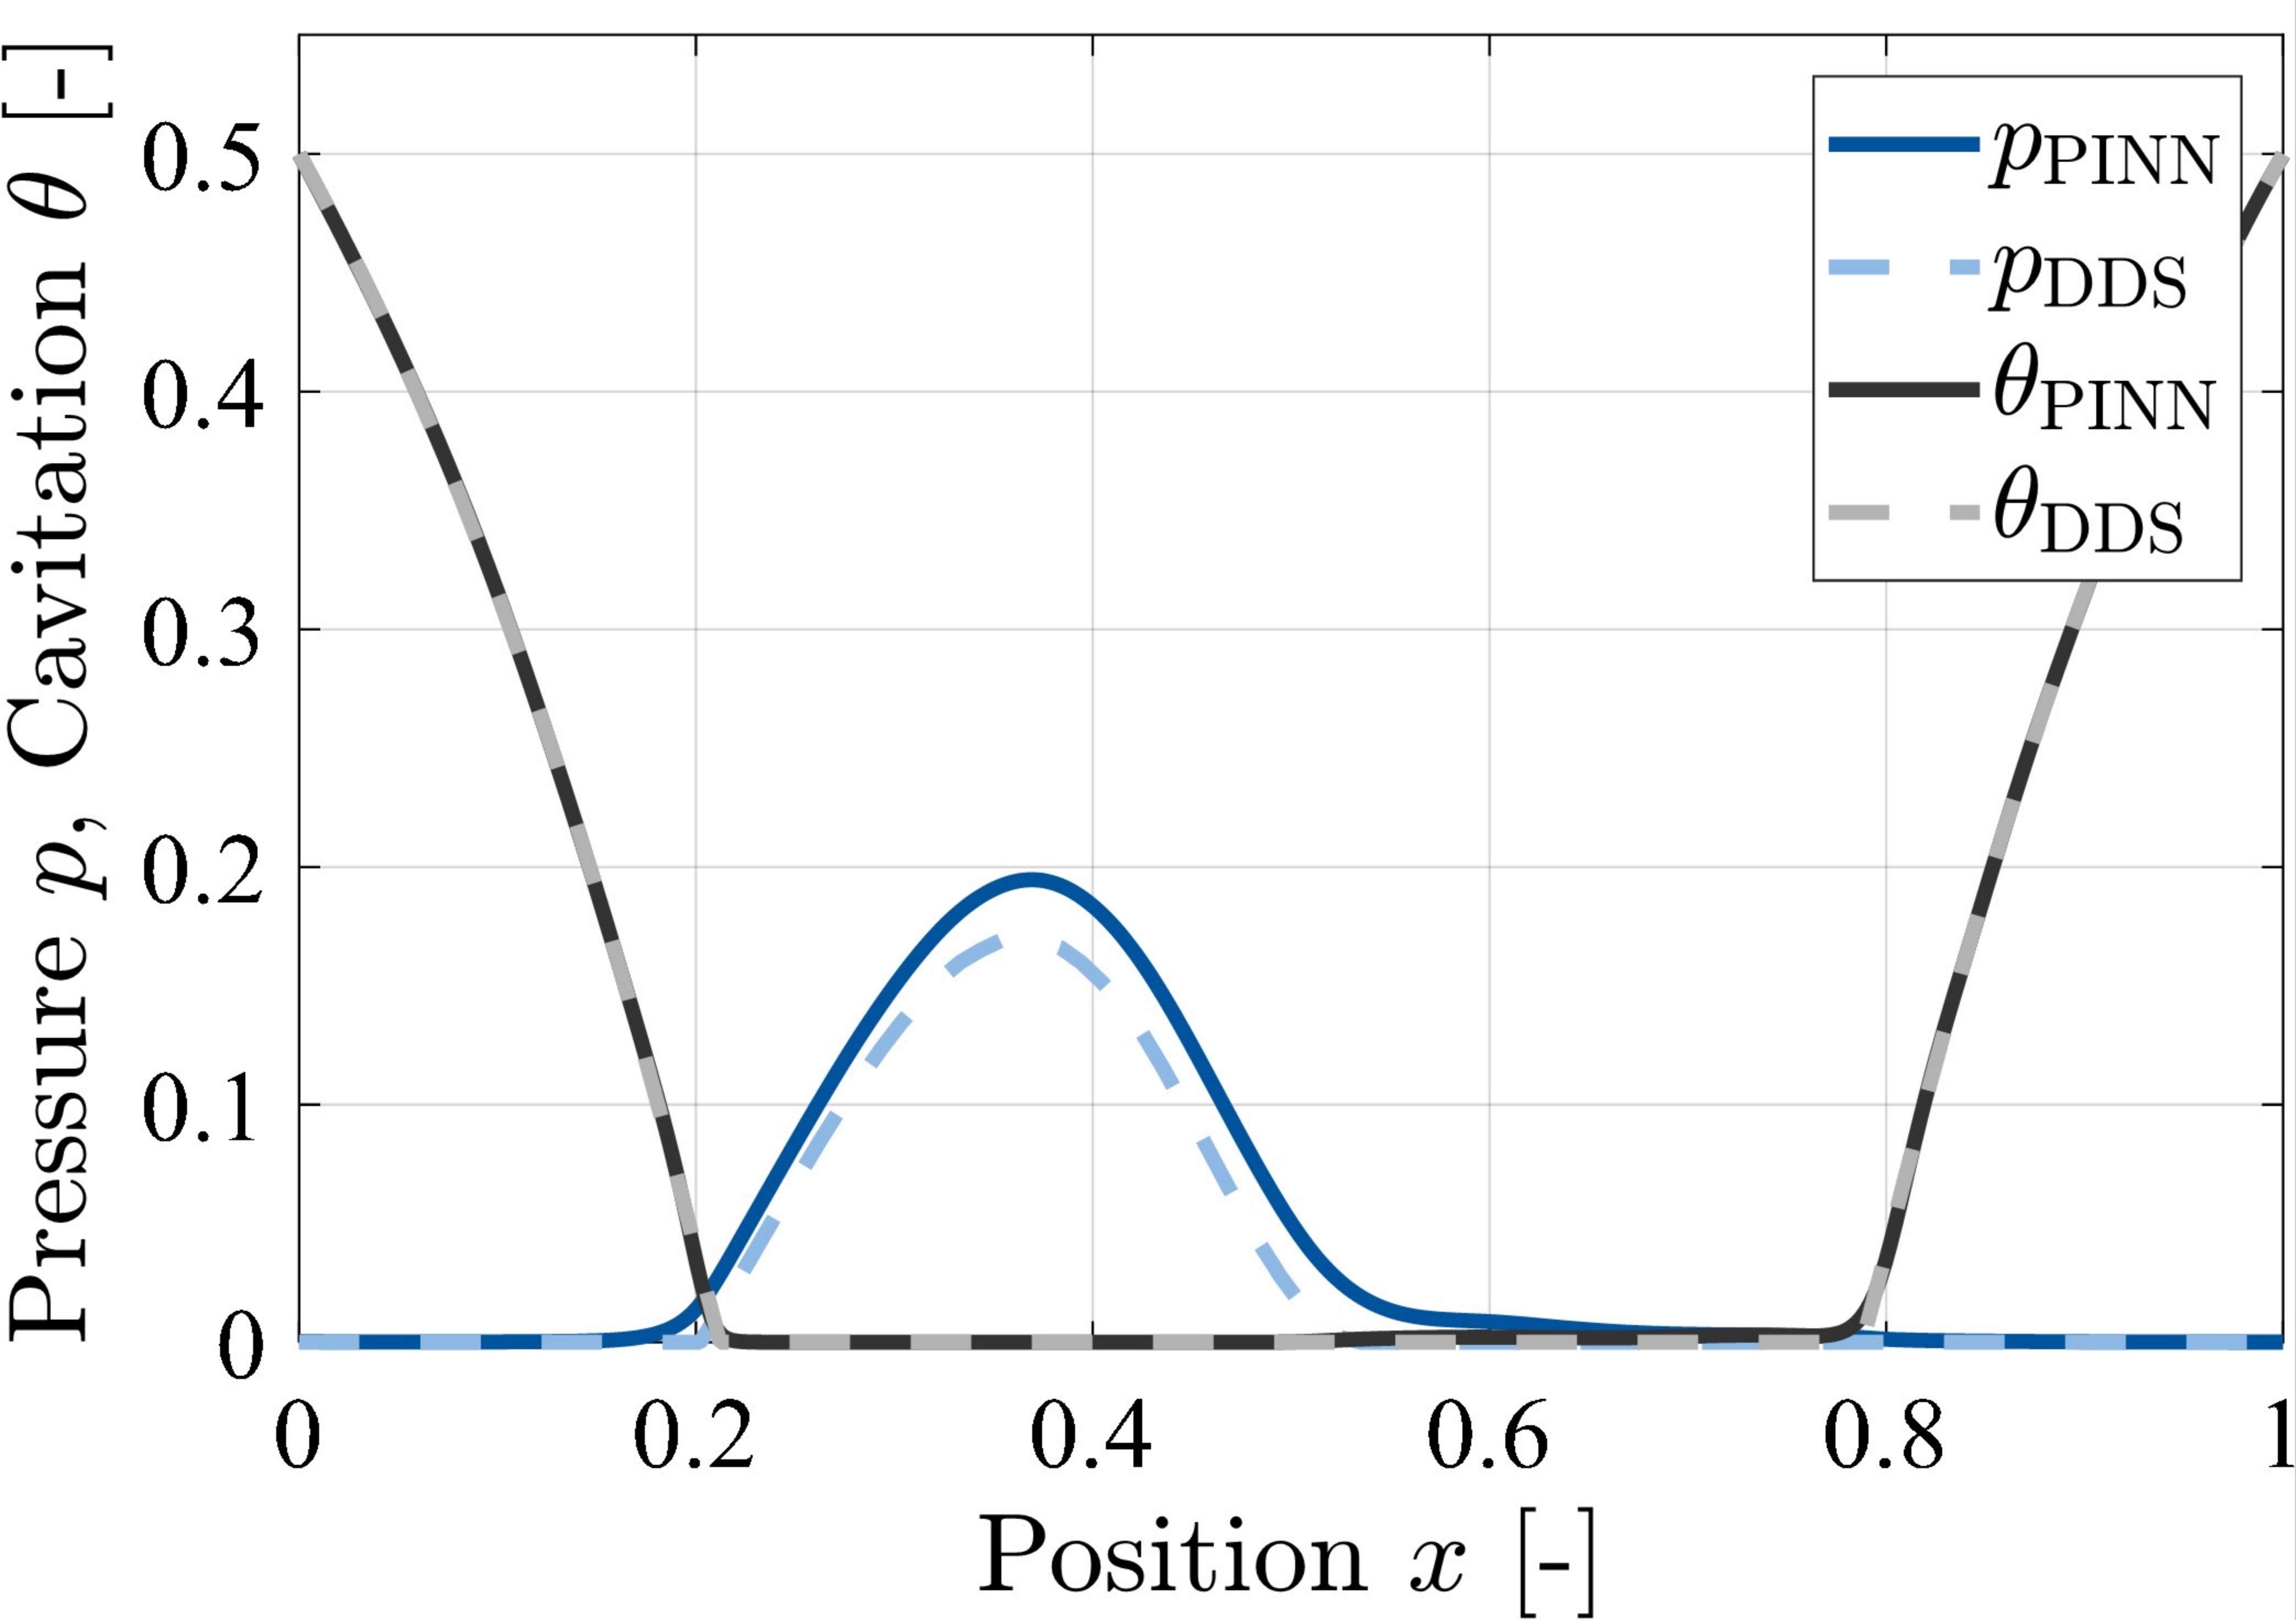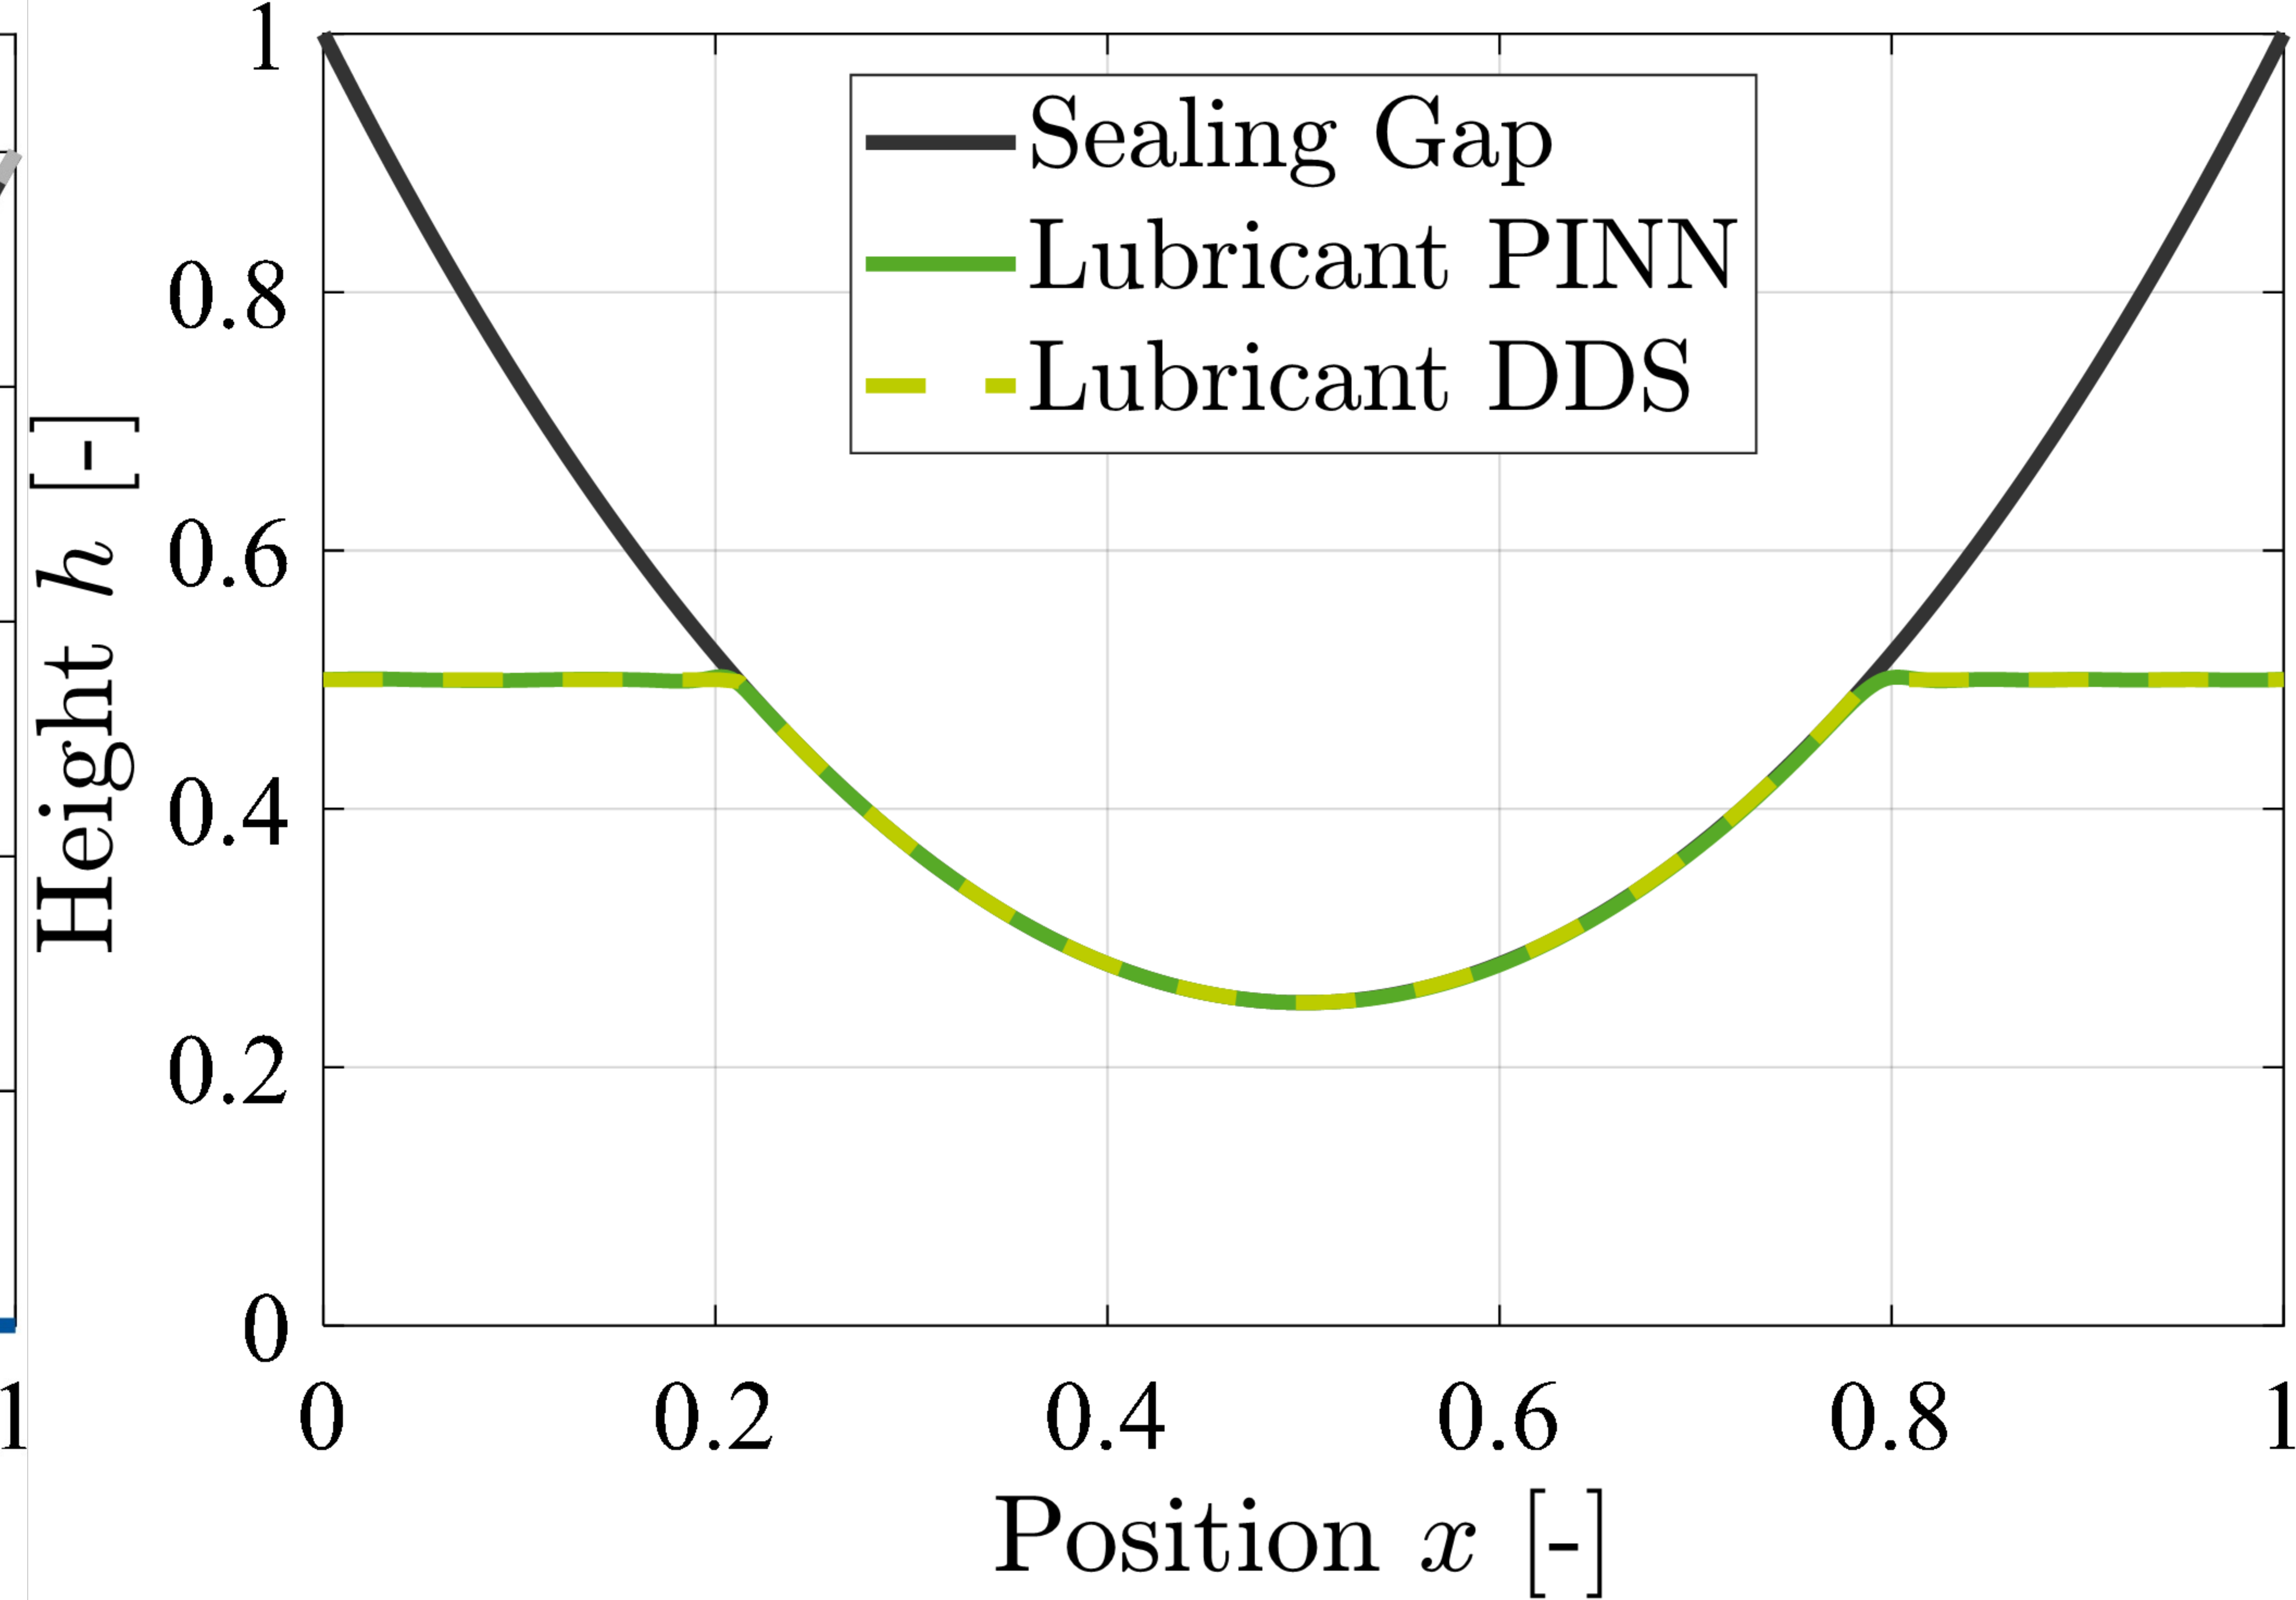

Supplement: Supplementary file 7 [file supplementary]

Input

Hidden Layers

Output

AD

Losses

Optimise

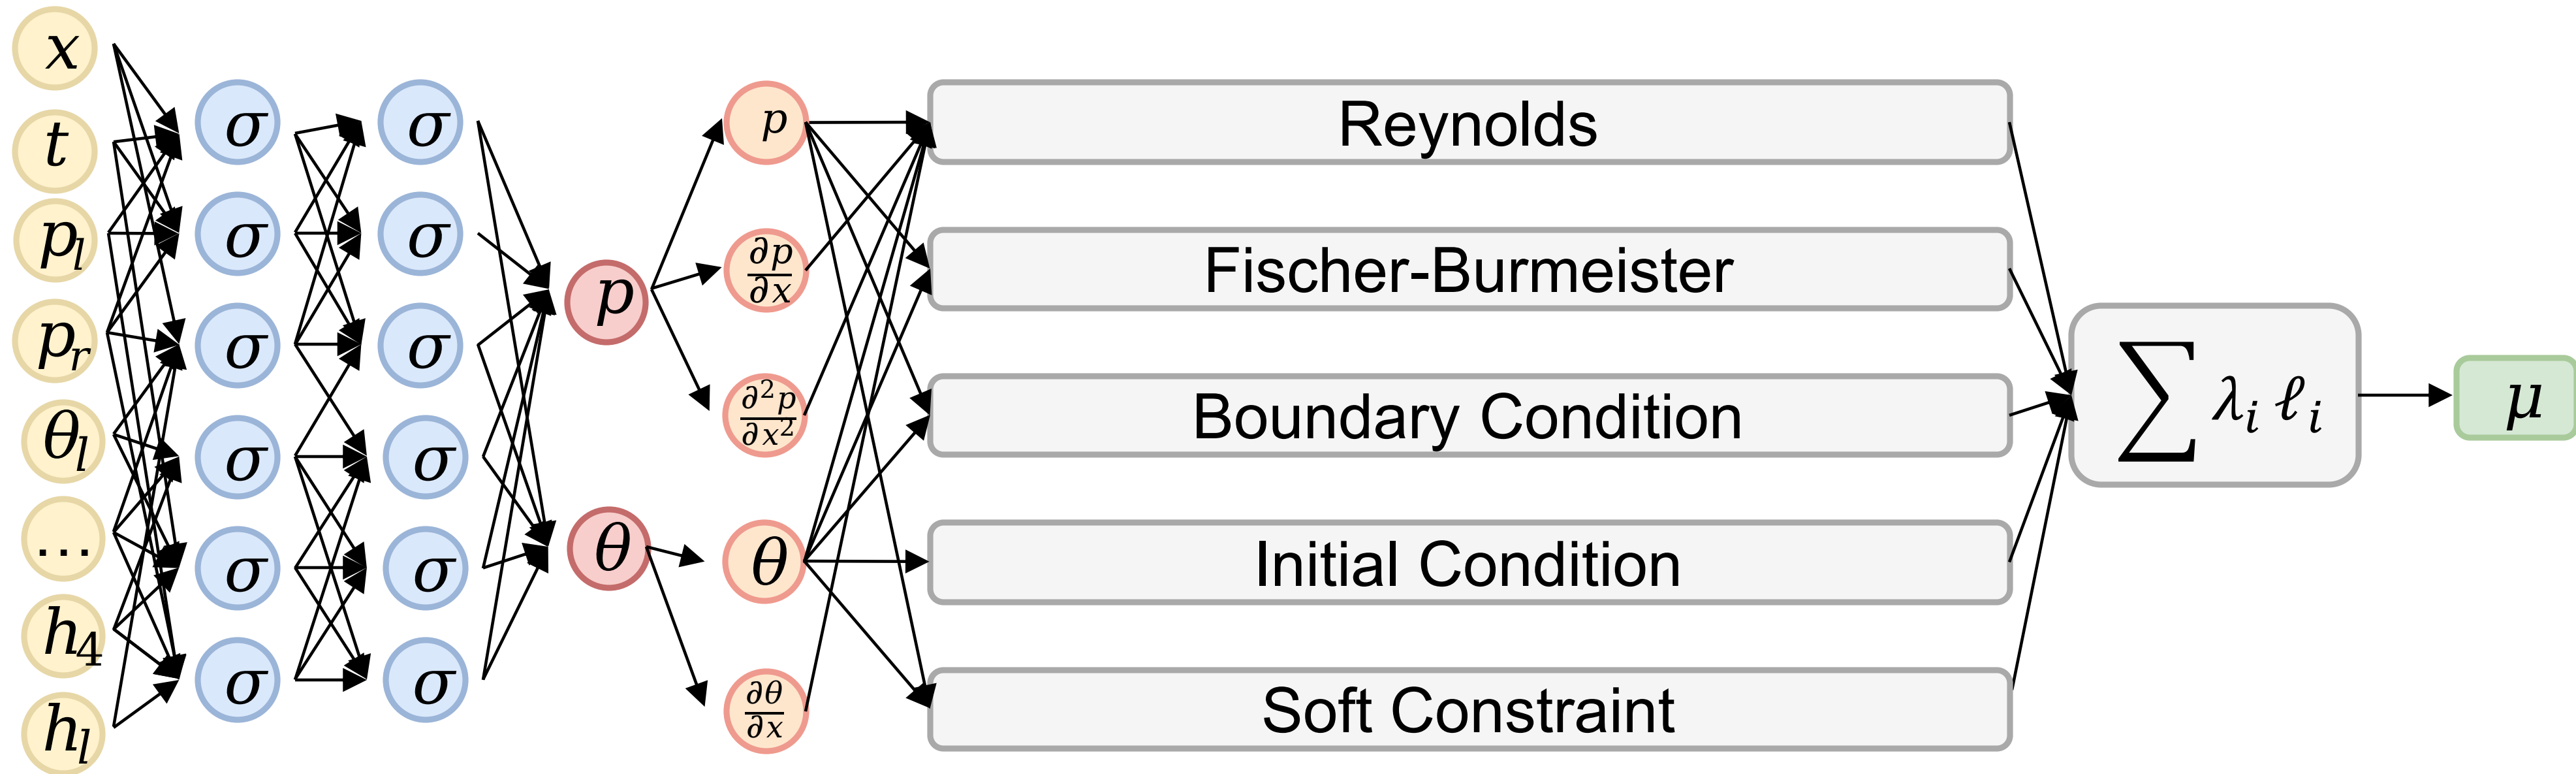

Supplement: Supplementary file 8 [file supplementary]

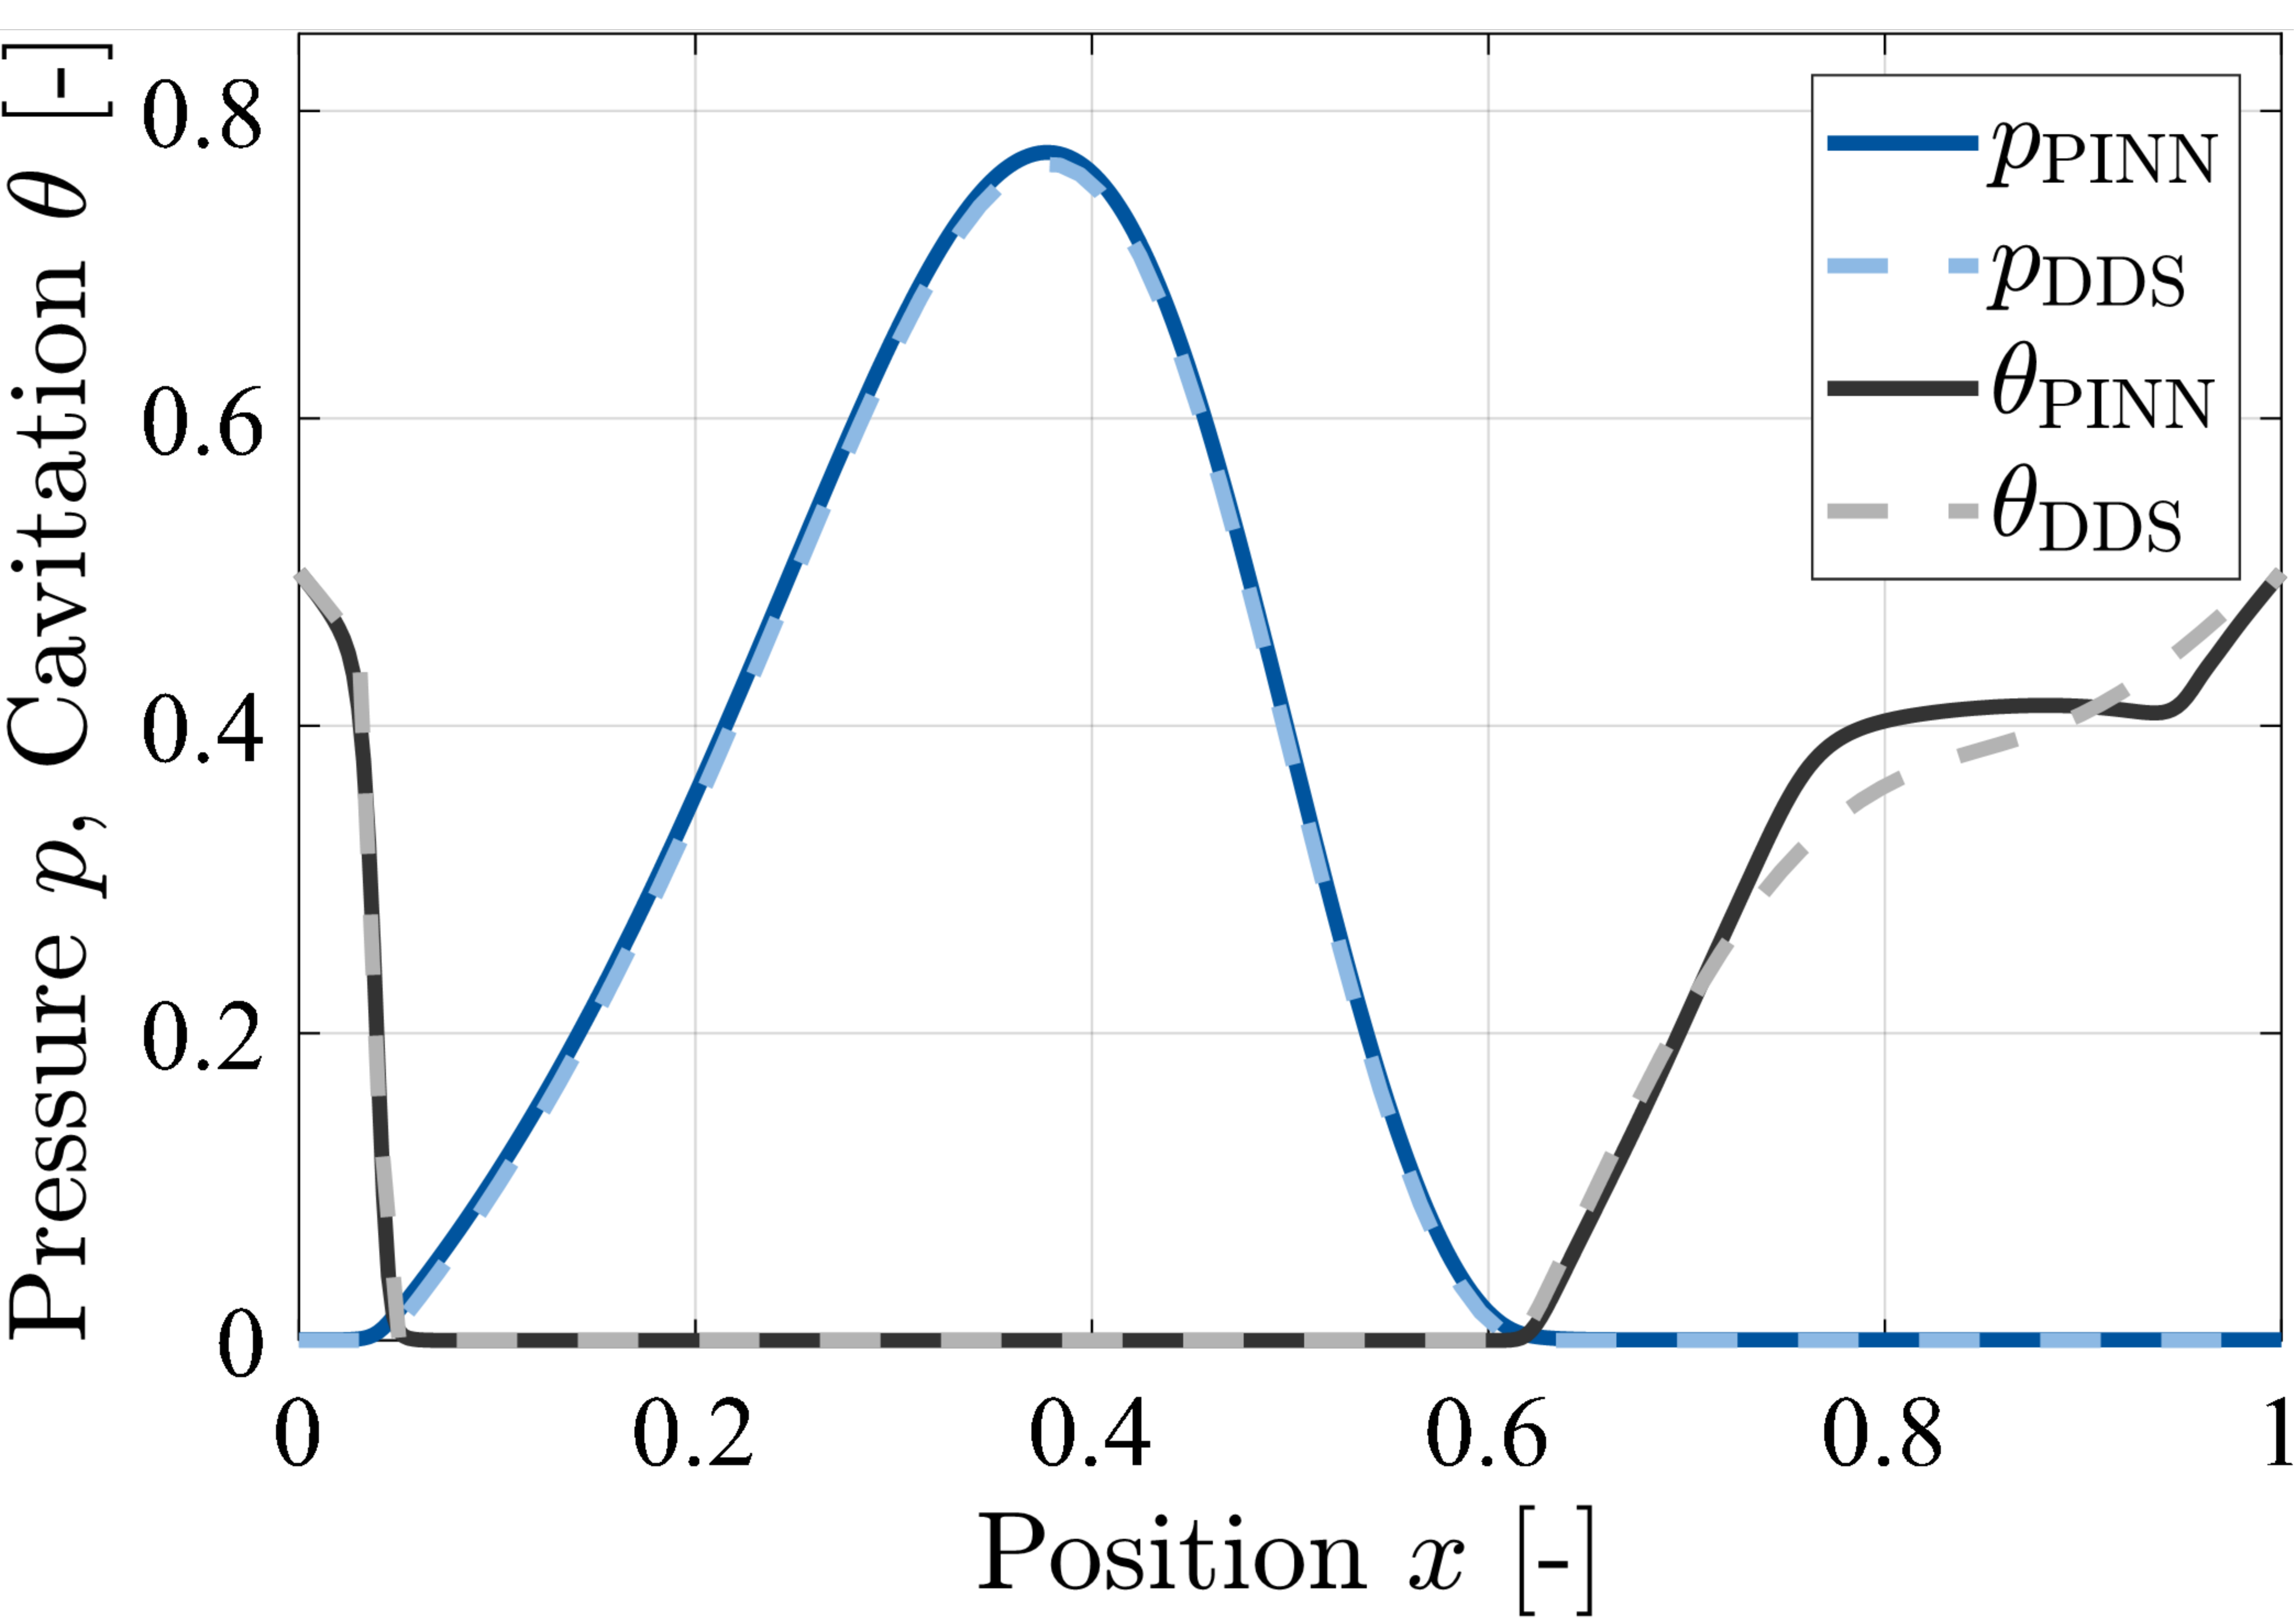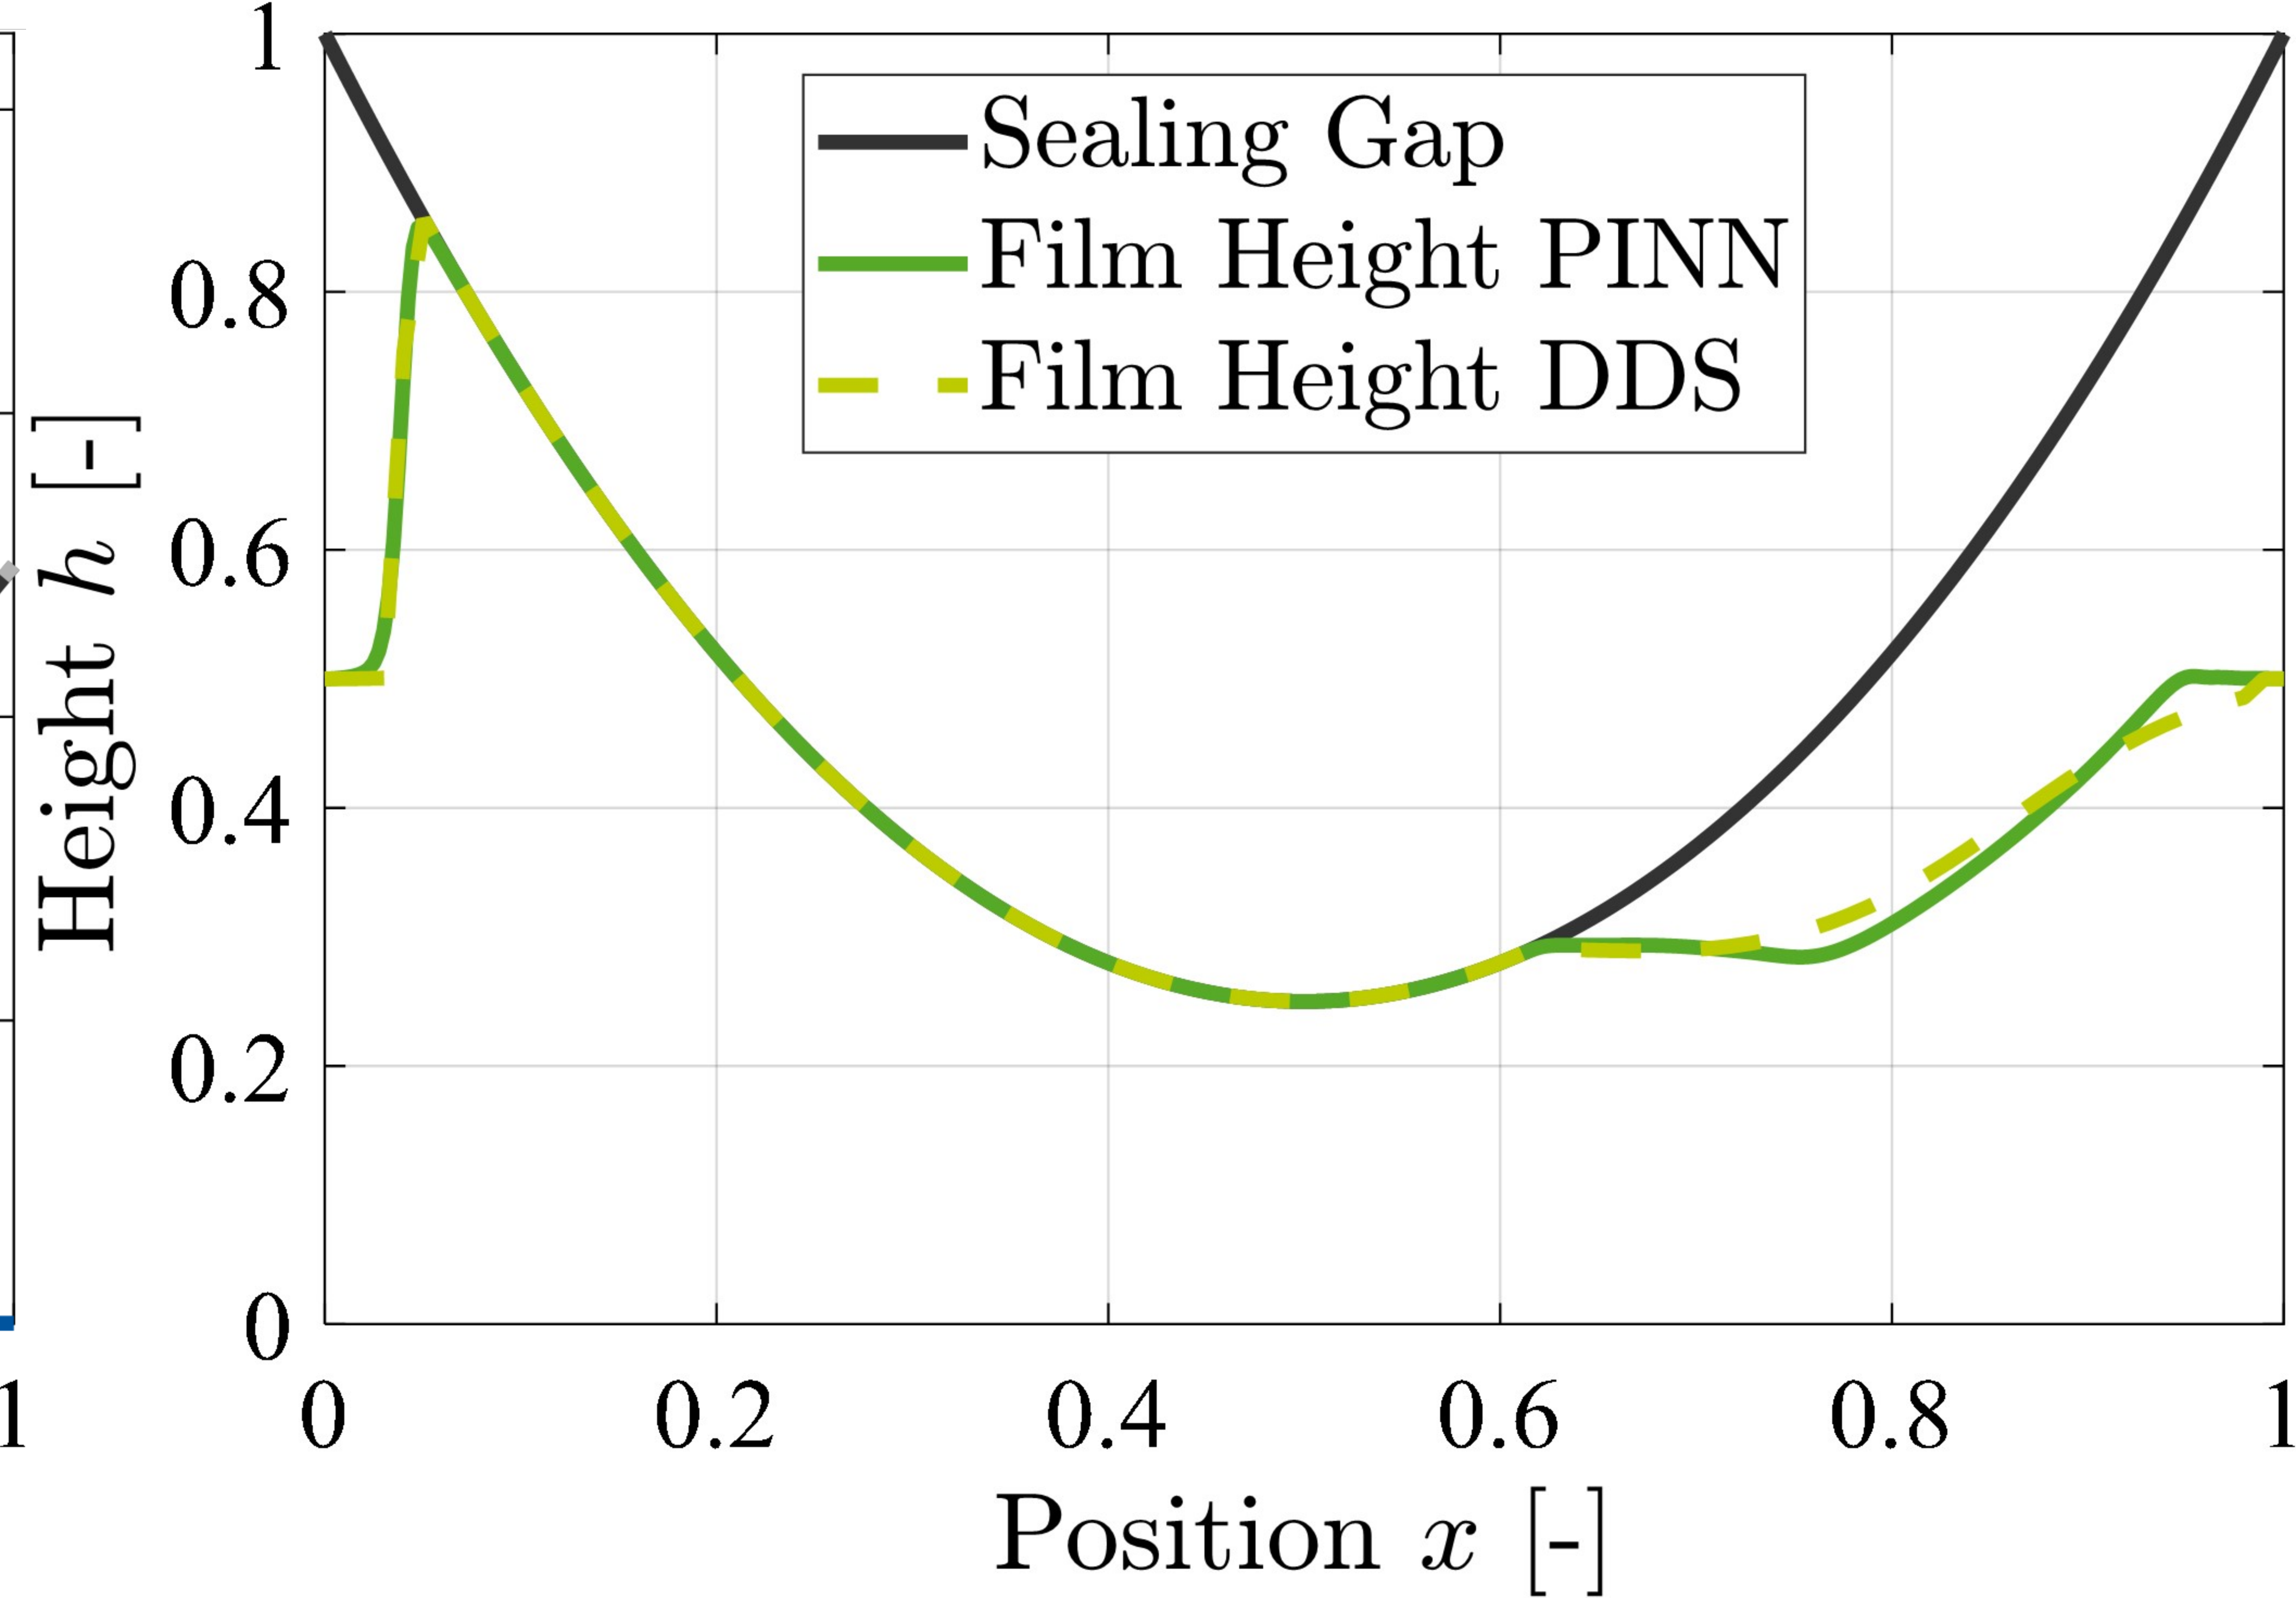

Supplement: Supplementary file 10 [file supplementary]

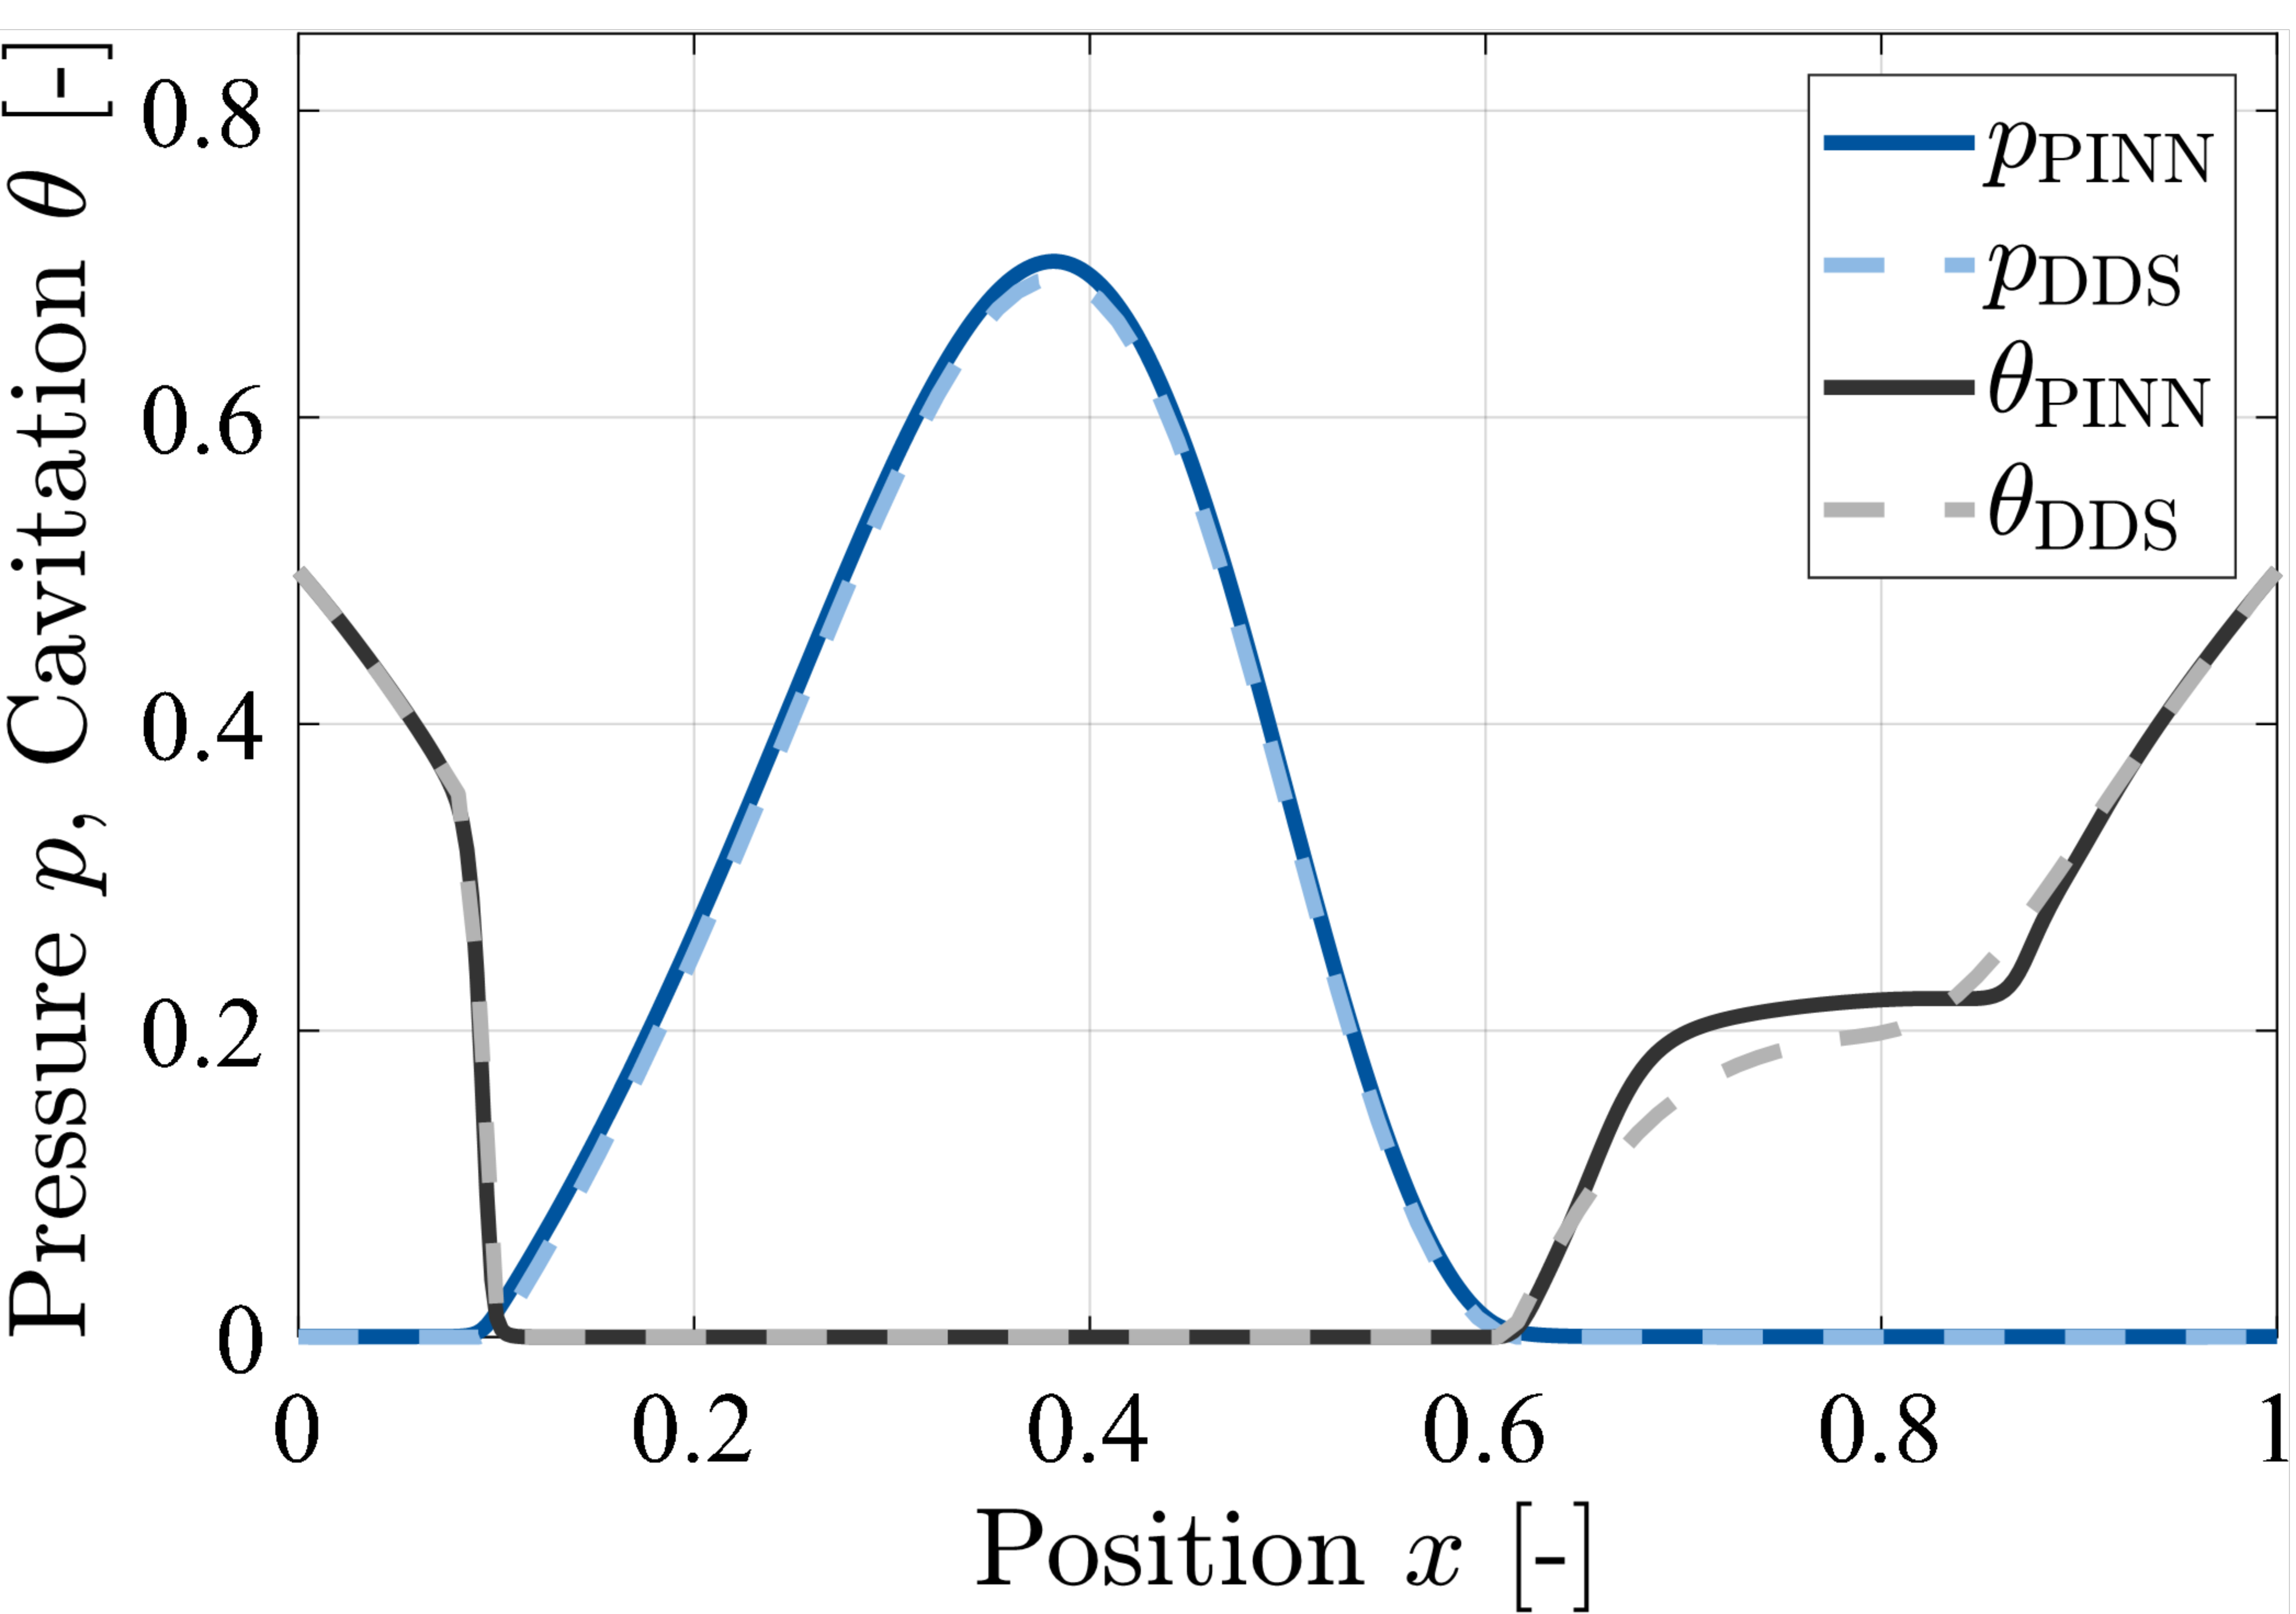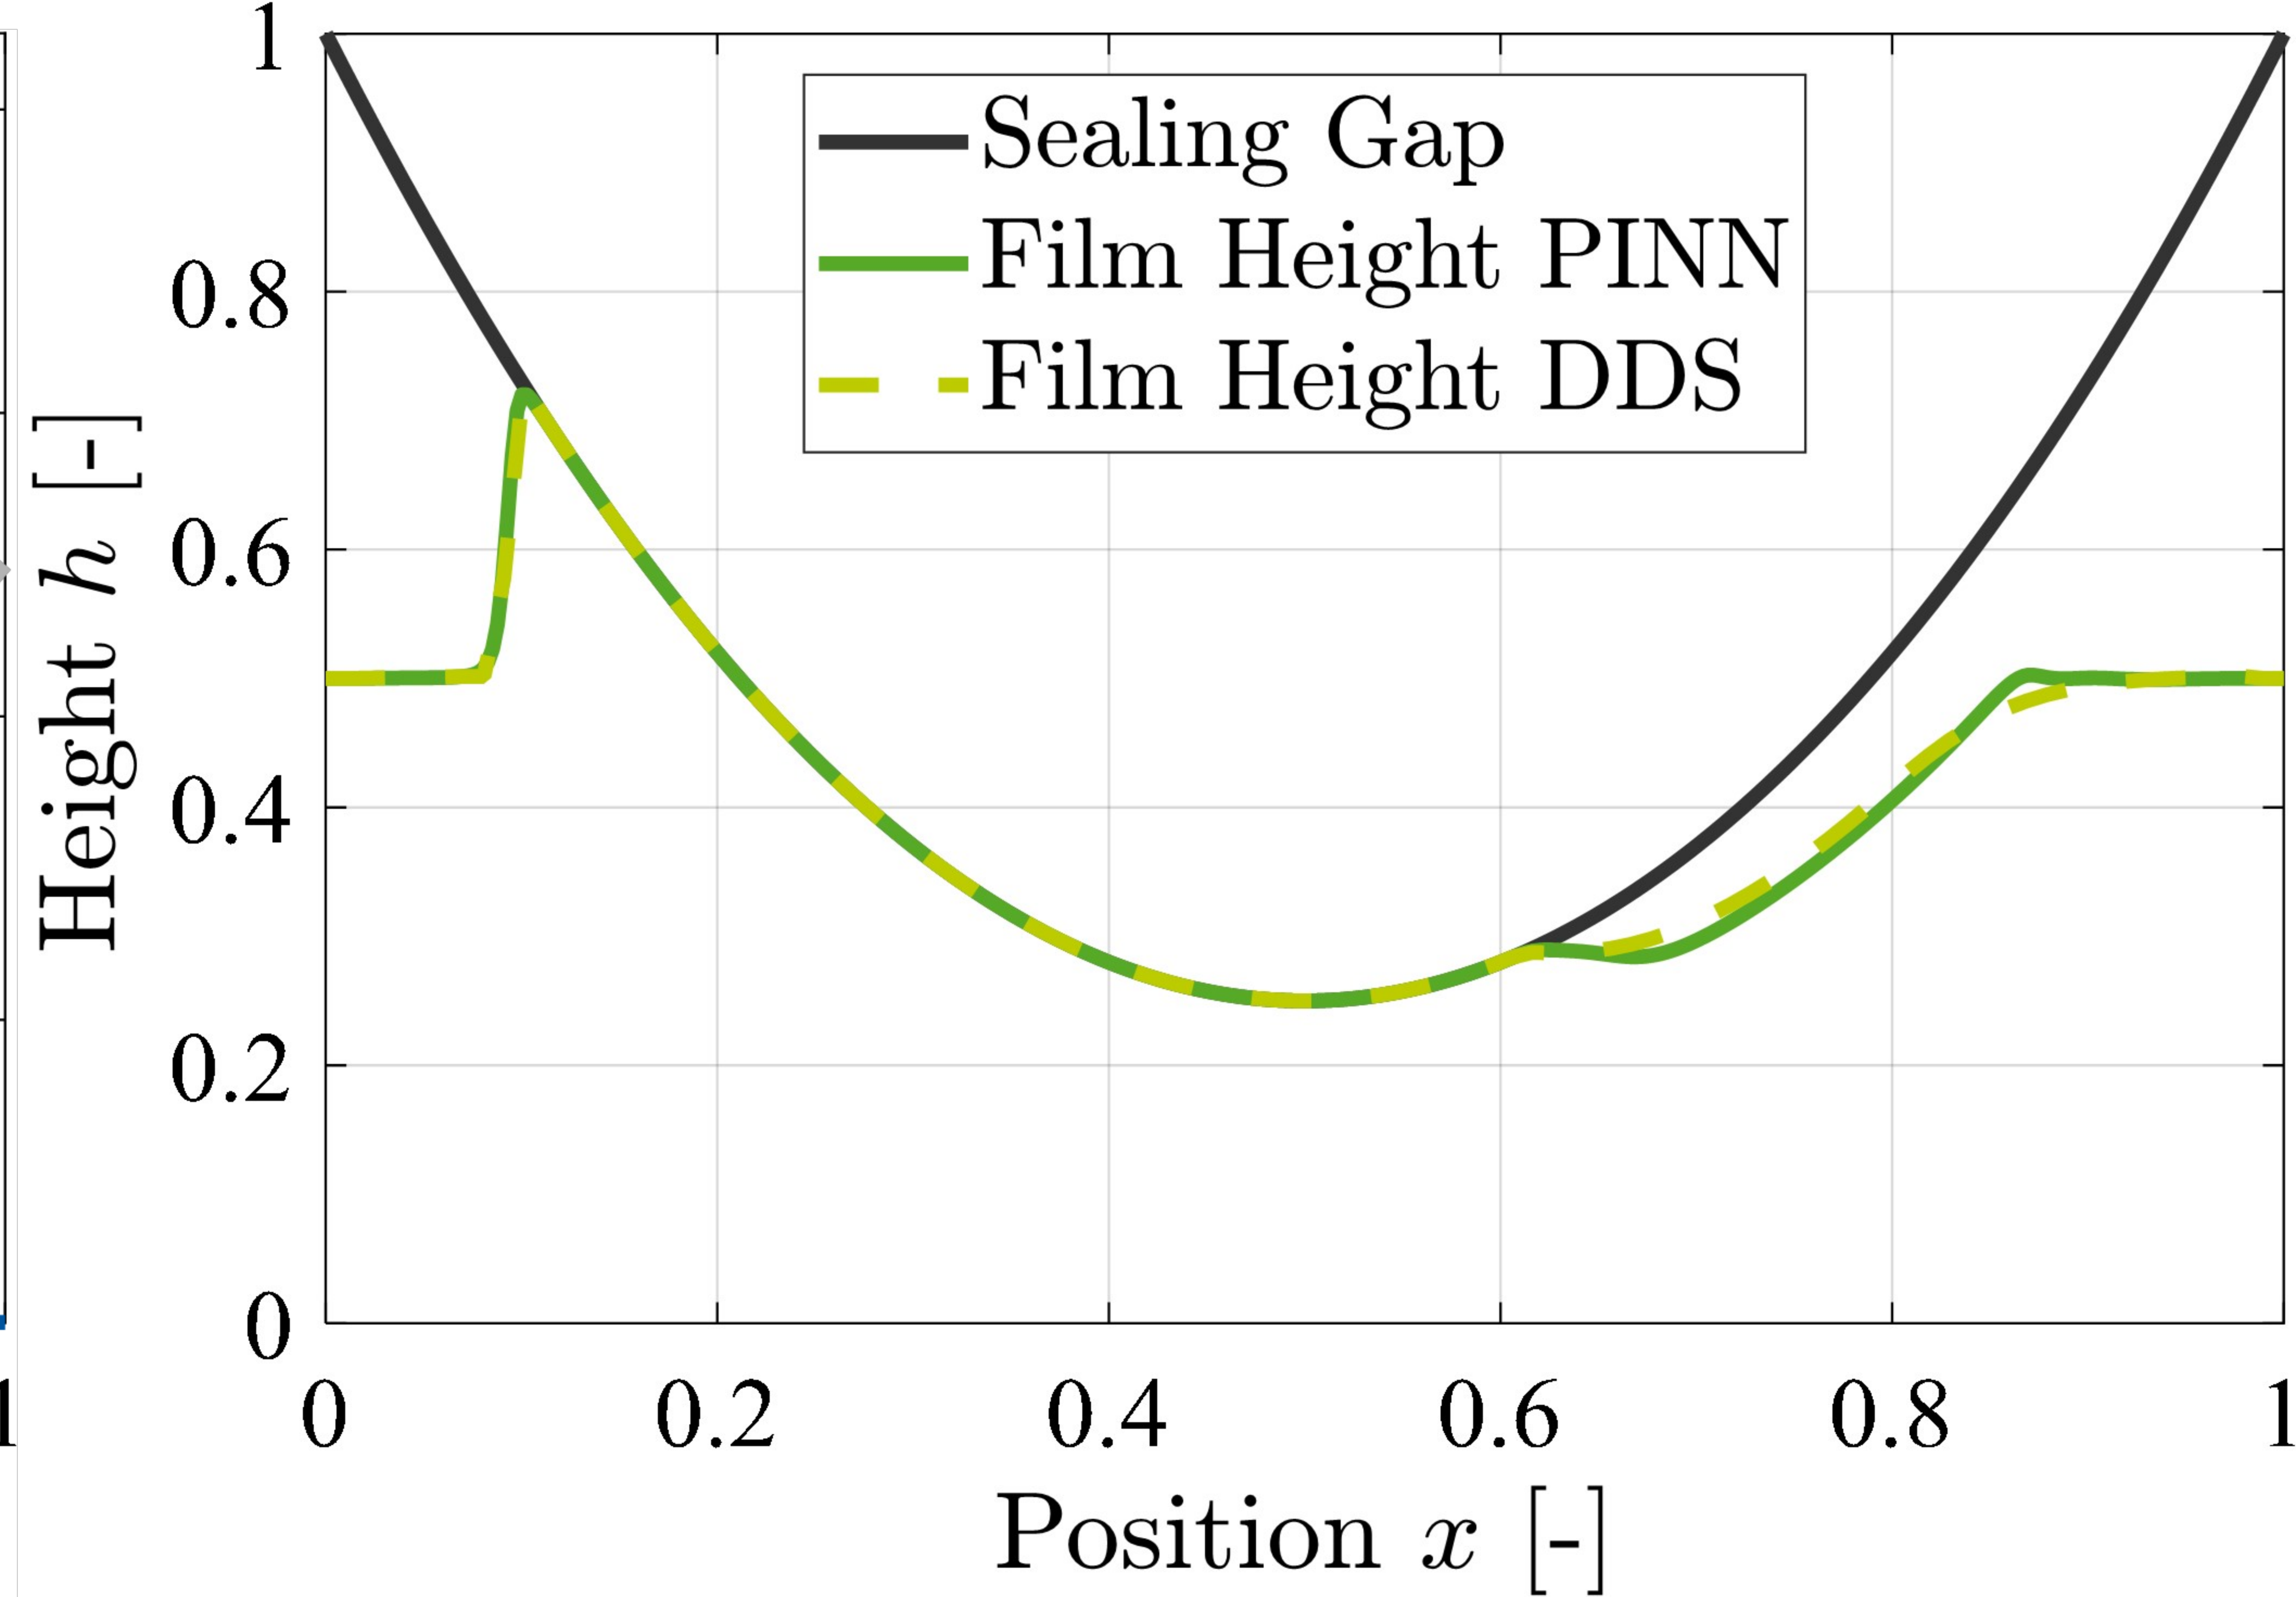

Supplement: Supplementary file 11 [file supplementary]

$$h_1 = 1$$

$$h_2 = 1$$

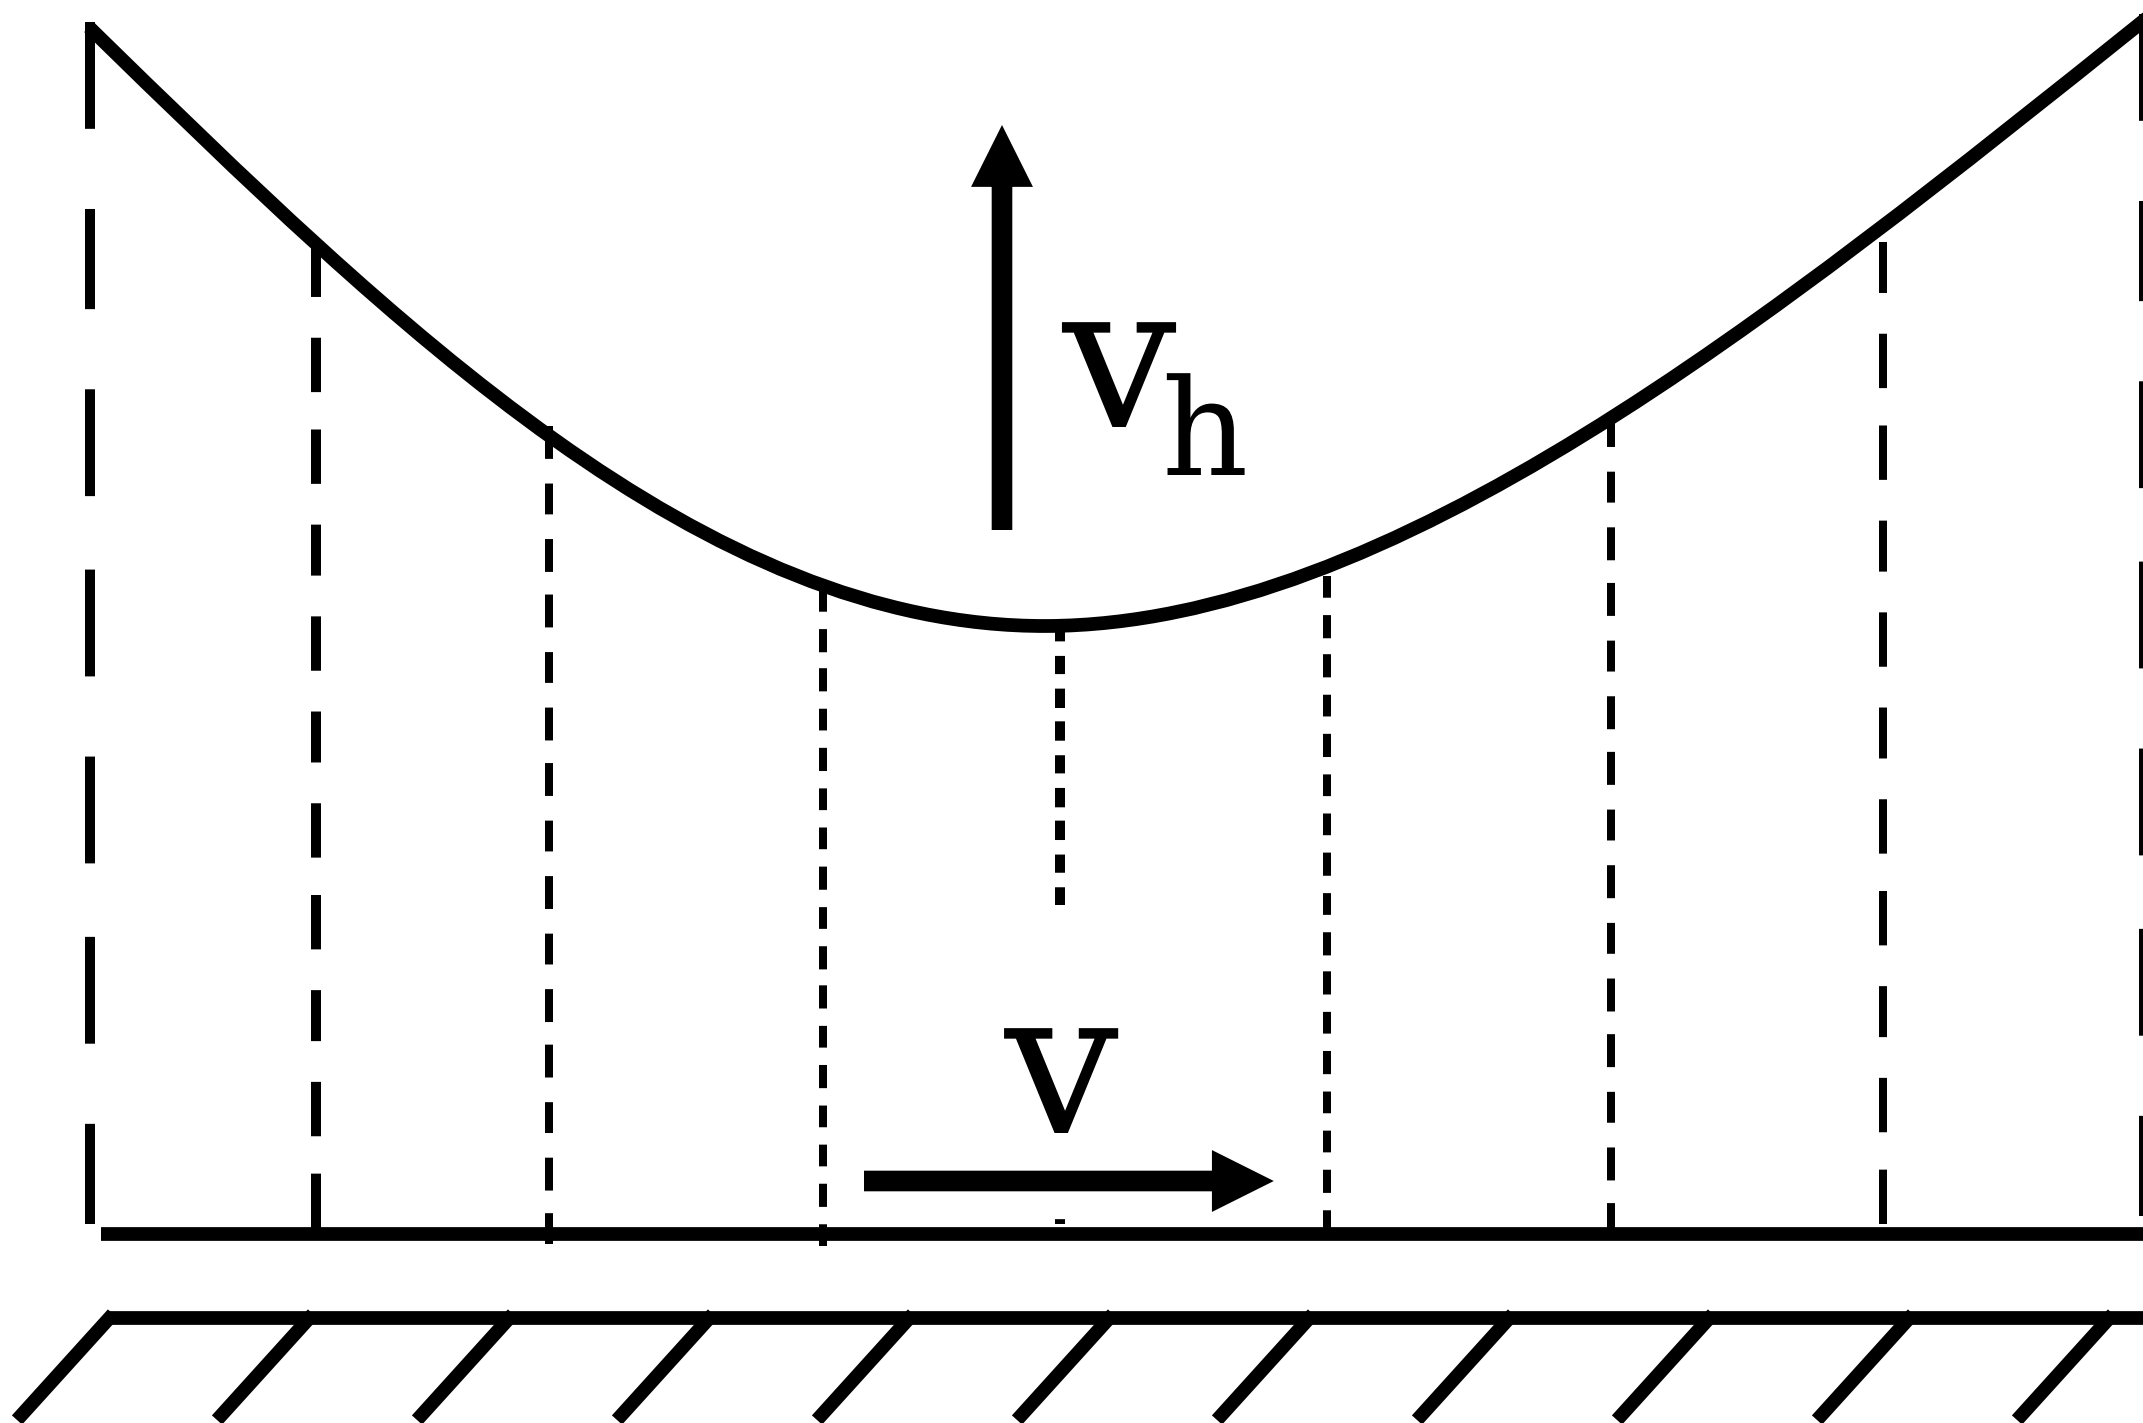

$$x=0$$

$$x=1$$

Supplement: Supplementary file 12 [file supplementary]
